1  
2  
3  
4  
5 **IMEGLIMIN AMPLIFIES GLUCOSE-STIMULATED INSULIN**  
6 **RELEASE FROM DIABETIC ISLETS VIA A DISTINCT**  
7 **MECHANISM OF ACTION**  
8

9  
10  
11 Short Title: *Imeglimin reverses islet  $\beta$ -cell dysfunction*  
12

13  
14  
15 Sophie Hallakou-Bozec<sup>1</sup>, Micheline Kergoat<sup>2</sup>,  
16 Pascale Fouqueray<sup>1</sup>, Sébastien Bolze<sup>1</sup>, David E. Moller<sup>1,\*</sup>  
17

18  
19  
20  
21 <sup>1</sup>Poxel SA, 259-261 Avenue Jean Jaures, 69007 Lyon, France

22 <sup>2</sup>Metabrain Research, 19 avenue du professeur Cadiot 94700- Maisons-Alfort, France  
23  
24  
25  
26  
27  
28  
29

30 \*Corresponding author:

31 [david.moller@poxelpharma.com](mailto:david.moller@poxelpharma.com)

32 1-317-997-7963

33 Poxel SA, 259-261 Avenue Jean Jaures, 69007 Lyon, France  
34  
35  
36

38 **ABSTRACT**

39 Pancreatic islet  $\beta$ -cell dysfunction is characterized by defective glucose-stimulated insulin secretion  
40 (GSIS) and is a predominant component of the pathophysiology of diabetes. Imeglimin, a novel first-  
41 in-class small molecule tetrahydrotriazine drug candidate, improves glycemia and GSIS in preclinical  
42 models and clinical trials in patients with type 2 diabetes; however, the mechanism by which it  
43 restores  $\beta$ -cell function is unknown. Here, we show that Imeglimin acutely and directly amplifies  
44 GSIS in islets isolated from rodents with Type 2 diabetes via a mode of action that is distinct from  
45 other known therapeutic approaches. The underlying mechanism involves increases in the cellular  
46 nicotinamide adenine dinucleotide (NAD<sup>+</sup>) pool - potentially via the salvage pathway and induction  
47 of nicotinamide phosphoribosyltransferase (NAMPT) along with augmentation of glucose-induced  
48 ATP levels. Further, additional results suggest that NAD<sup>+</sup> conversion to a second messenger, cyclic  
49 ADP ribose (cADPR), via cyclic ADP ribose hydrolase (CD38) is required for Imeglimin's effects in  
50 islets, thus representing a potential link between increased NAD<sup>+</sup> and enhanced glucose-induced  
51 Ca<sup>2+</sup> mobilization which - in turn - is known to drive insulin granule exocytosis. Collectively, these  
52 findings implicate a novel mode of action for Imeglimin that explains its ability to effectively restore  
53  $\beta$ -cell function and provides for a new approach to treat patients suffering from Type 2 diabetes.

54

55 **KEYWORDS:**

56 **imeglimin, therapeutic, islets, glucose-stimulated insulin secretion, animal model**

57

58

## 59 INTRODUCTION

60 Type 2 diabetes (T2DM) is characterized by insulin resistance plus  $\beta$ -cell dysfunction (1).  
61 Existing therapies may only be partially effective or not well tolerated (1). Glucagon-like peptide  
62 receptor (GLP1) agonists act on  $\beta$ -cells to amplify GSIS (2). However, these agents are peptides with  
63 limited oral bioavailability and are usually administered parenterally. Therefore, the pursuit of newer  
64 therapies, in particular small molecules which could function to reverse  $\beta$ -cell dysfunction, is  
65 warranted.

66 Imeglimin is a novel oral antidiabetic drug to treat Type 2 diabetes. Its novel structure and  
67 proposed mechanism of action establishes the first in a new tetrahydrotriazine class called the  
68 “glimins” (3). Three Phase III clinical trials were recently completed and strong efficacy was seen in  
69 multiple trials (3–5). Imeglimin’s mode of action involves dual effects; to ameliorate insulin  
70 resistance and potentiate GSIS (6,7).

71 Imeglimin has prominent effects to reverse  $\beta$ -cell dysfunction and amplify GSIS: it  
72 ameliorates hyperglycemia in models with pancreatic deficient  $\beta$ -cell mass and function including  
73 neonatal streptozotocin (NOSTZ) diabetic rats and Goto-Kakizaki (GK) rats and increases  
74 insulinogenic index during glucose tolerance tests (6); *in vivo* GSIS is enhanced in both lean and high-  
75 fat fed rats (8); increased GSIS was seen in hyperglycemic clamps in non-diabetic and NOSTZ-  
76 diabetic rats (6). In addition, a strictly glucose-dependent effect to enhance insulin secretion was seen  
77 with non-diabetic isolated rat islets (8). Moreover, 7 day administration of Imeglimin to Type 2  
78 diabetes patients substantially amplified net GSIS as assessed by hyperglycemic clamp (9).

79 Given major effects on GSIS, we tested the hypothesis that Imeglimin could acutely and  
80 directly impact  $\beta$ -cell dysfunction using islets isolated from Type 2 diabetes animal models (GK and  
81 NOSTZ-diabetic rats). As an emerging therapeutic option for patients, it is also important to elucidate

82 the mechanism of action. Thus, we conducted a series of studies using islets isolated from GK rats to  
83 define effects on pathways leading to GSIS amplification. GK rats are a non-obese Type 2 diabetes  
84 model of “isolated”  $\beta$ -cell dysfunction; many features resemble human disease including a loss of  
85 first phase insulin secretion, reduced  $\beta$ -cell mass, reduced islet insulin content, inflammation in islets,  
86 and impaired islet mitochondrial function (10). Here, we determined that the mechanism of action of  
87 Imeglimin was distinct vs. common antidiabetic therapies (metformin or sulphonylureas) and  
88 independent from mechanisms mediating the effects of other agents known to affect GSIS (GLP1  
89 receptor agonists or phospholipase C pathway modulators). In contrast, Imeglimin increases  $\text{NAD}^+$   
90 levels in GK rat islets, potentially via the “salvage pathway” involving NAMPT and also increases  
91 cellular ATP content, suggesting an improvement in mitochondrial function. Further, we provide  
92 evidence suggesting a link, via CD38 and the generation of key  $\text{NAD}^+$  metabolites, between the  
93 increased  $\text{NAD}^+$  pool and enhanced intracellular  $\text{Ca}^{2+}$  mobilization. These findings implicate a novel  
94 mode of action for Imeglimin that could be further leveraged to support the selection of appropriate  
95 patients and enhance its clinical utility or to develop improved agents in this new therapeutic class.

96

## 97 **METHODS**

### 98 **Animals, Islet Isolation, Insulin Secretion and Intracellular $\text{Ca}^{2+}$**

99 Animal studies were conducted at Metabrain Research (Maisons-Alfort, France) according to  
100 European guidelines (ETS 123) and were approved by the Ethics Committee. Rats were housed 4 per  
101 cage in controlled room (22°C; 12 hour light-dark cycle) with ad libitum access to water and normal  
102 chow (A113; Scientific Animal Food and Engineering, AUGY-France). N0STZ rats were obtained  
103 by intravenous injection of streptozotocin (100 mg/kg) of rat pups (Charles River) as described (11);  
104 11-12 week-old rats with hyperglycemia and defective GSIS were used (12). Male Wistar rats (11-14

105 week-old; Charles River) and male GK rats (14 week old; Metabrain Research) were also used.

106 Rats were anesthetized with i.p. sodium pentobarbital and sacrificed by decapitation. Islets  
107 were prepared by injection of collagenase (Sigma) into the pancreatic duct and surgical removal of  
108 the pancreas. The pancreas was digested for 9-11 min at 37°C, filtered and rinsed (Hank's buffer  
109 solution containing BSA), and purified with a Ficoll gradient (Sigma) followed by several washes.  
110 For static incubations, islets were distributed into 24 well plates; 9-16 wells per group with 6-12 islets  
111 per well, depending on the experiment. Islets were incubated for 20-30 min in Krebs Ringer Buffer  
112 (KRB) 0.2% BSA with and without test compounds in low (2.8 mM) or high (16.7 mM) glucose  
113 (DMSO 0.1% for all conditions) followed by removal of supernatant samples (stored at -20°C until  
114 insulin was measured. Selected test agents included Imeglimin (Poxel SA), GLP1, metformin, an  
115 imidazoline (13) phospholipase C (PLC) pathway activator (BL11282, Metabrain Research) and a  
116 PLC inhibitor (U73122, SIGMA U6756).

117 For perfusions, islets were distributed (12 per well; 4 well-plates) in KRB containing 5.5 mM  
118 glucose and BSA (5 mg/ml) and maintained at 37°C under 95% O<sub>2</sub>/5% CO<sub>2</sub>. In selected studies, islets  
119 were loaded with Fura-2-AM (7.5 μM) added to buffer for 1 hour followed by three buffer exchanges.  
120 Batches of 8 islets each were placed in a chamber and perfused at 1 ml/min with Hepes-BSA  
121 (1mg/ml) buffer alternately containing glucose 2.8mM or 16.7mM with or without test compounds.  
122 Perifusate was collected every minute. For intracellular Ca<sup>2+</sup>, the chamber was placed on the stage  
123 of a NIKON TE300 microscope (37°C); individual islets were imaged via excitation at 340nm and  
124 380nm and fluorescence detection (510nm) with a photomultiplier (Photon Technologies  
125 International, Princeton, NJ). Intracellular Ca<sup>2+</sup> results were expressed as ratio of F<sub>340nm</sub>/F<sub>380nm</sub>.  
126 Insulin levels were measured via Elisa (Alpco 80-INSRTU-E01 or 80-INSRT-E01).

127

128 **Measurement of Intracellular Analytes**

129 For cAMP, GK islets were incubated 30 min in 2.8 mM glucose and then incubated 15 min in  
130 2.8 or 16.7 mM glucose with or without test compounds plus a phosphodiesterase inhibitor (IBMX 1  
131 mM) to prevent cAMP degradation. Supernatants were removed by centrifugation and islets were  
132 maintained at -80°C in lysis buffer (Amersham RPN225). cAMP levels were subsequently measured  
133 using the same kit.

134 Dinucleotide content was determined with 20 islets/well in 96 well filter plates; islets were  
135 placed in KRB with 16.7mM glucose with or without Imeglimin or nicotinamide (Sigma).  
136 Gallotannin was also used where noted (Santa Cruz, K2613). After 20 min, supernatants were  
137 removed by centrifugation and islets were stored at -80°C followed by lysis in PBS-  
138 dodecyltrimethylammonium bromide solution; NAD<sup>+</sup> and NADH were determined using Promega  
139 kit G9071; NADP<sup>+</sup> and NADPH were determined using Promega kit G9081.

140 For ATP and ADP, islets (50 per dish) were stabilized in 5 ml of KRB, 0.2% BSA with glucose  
141 2.8mM for 30 min followed by distribution into 24 well plates (20 islets/well) in KRB 0.2% BSA  
142 with glucose 16.7 mM with or without test compounds. After 10 min, islets were transferred to 96  
143 well filter plates and then maintained at -80°C. After lysis (ATP kit buffer), ATP content was  
144 measured by luminescence (ATP lite, Perkin Elmer, 6016643); ADP content was measured with a  
145 fluorimetric assay (Sigma Aldrich, ref. MAK033).

146

#### 147 **NAMPT Activity and Gene Expression**

148 Islets were lysed in 50mM Tris-HCl pH 7.5/0.02% BSA, 0.1% Triton X-100; iNAMPT  
149 activity was determined in pools of 60 islets with a colorimetric Cyclex assay kit (Clinisciences, ref.  
150 CY-1251). Human recombinant (*E. Coli*) NAMPT activity was measured using the same kit after 60  
151 min. incubation.

152 Frozen (-80°C) islets (pools of 20) were homogenized followed by extraction and purification

153 (RNAzol kit). RT-PCR measurements employed the AMV reverse transcriptase system (Applied  
154 Biosystems 4368814) and Q-PCR reactions (7900HT Fast Real-Time PCR, Applied Biosystems)  
155 using primers corresponding to two different exons. Levels of NAMPT mRNA were expressed as  
156 increases or decreases in cycle time [Ct] numbers compared to control after normalization to HPRT  
157 or  $\beta$ -actin housekeeping genes.

158

### 159 **CD38 Knockdown in Islets**

160 Islets were cultured 24 hours in RPMI medium (11 mM glucose plus inactivated serum,  
161 antibiotics, glutamine, 10 mM HEPES) and then placed in 10 cm<sup>2</sup> plates (100 islets, each), washed in  
162 PBS and incubated 15 min on ice in permeabilization buffer (Lyovec 40 $\mu$ l/100 islets/5ml medium,  
163 Invitrogen) with siRNA from Origen (10 nM scrambled sequence or 10 nM directed against CD38).  
164 Islets were then cultured for 48h before further testing; 15 to 20 wells per group (10 islets/well). Static  
165 incubation in 16.7 mM glucose with or without test compounds was followed by removal of  
166 supernatant samples for insulin measurements and transfer of islets tubes for RNA extraction as  
167 above; CD38 mRNA levels were measured as described above for NAMPT.

168

### 169 **Modulation of cADPR and NAADP Signaling**

170 Islets were distributed (50 per dish) in 5 mL RPMI medium (11 mM glucose), and cultured at  
171 37°C in 95% O<sub>2</sub> and 5% CO<sub>2</sub> for 72 hr. For the last 17 hr., high concentration (200 $\mu$ M) Ryanodine  
172 (EnzoLife Sciences – Ref. ALX-630-062-M005), was added to selected dishes. After transfer to fresh  
173 dishes and incubation for 30 min (KRB/BSA buffer containing 2.8 mM glucose with or without  
174 Ryanodine), islets were distributed (6 per well) in 24-well plates in KRB containing 16.7 mM glucose  
175 with and without the indicated stimuli or inhibitors that also included cADPR (1 mM; Biolog–Ref.  
176 C005-025), NAADP (50 nM; SIGMA N5655), or combinations of two agents. After 20 min.

177 incubation, samples of supernatants were removed and stored at -20°C.

178

## 179 **Statistics**

180 Statistical analyses were performed using a Kruskal-Wallis non parametric one way ANOVA  
181 test followed by the Dunn's post test (GraphPad PRISM4). Where noted, comparison between two  
182 conditions was performed using an unpaired Student t-test.

183

## 184 **RESULTS**

### 185 **Imeglimin Amplifies GSIS in Diseased Rat Islets**

186  $\beta$ -cell function (GSIS) was impaired (-65%  $p < 0.001$ ) in N0STZ rat islets vs. Wistar control  
187 islets (Fig. 1A). GLP1 induced a non-significant trend (+42%) towards increased GSIS in N0STZ  
188 islets (Fig. 1B). In low glucose, Imeglimin did not modify insulin secretion; in 16.7mM glucose,  
189 increased insulin secretion was observed.

190

### 191 **Fig 1. Imeglimin Amplifies Insulin Secretion in Islets from N0STZ Rats**

192 N0STZ Rat Islets vs. Wistar Rat Islets (A). Islets from N0STZ or healthy Wistar rats were  
193 incubated in the presence of 2.8mM or 16.7mM glucose. Insulin levels were measured in supernatants  
194 after 30 min of incubation. \*\* $p < 0.01$ , \*\*\* $p < 0.001$  vs. respective low glucose values; mean  $\pm$  SEM;  
195  $n = 6$  wells with 6 islets per well.

196 Effect of Imeglimin and GLP1 on Insulin Secretion from N0STZ Rat Islets (B). Islets from  
197 N0STZ rats were incubated in the presence of 2.8m or 16.7mM glucose with or without the tested  
198 concentrations of Imeglimin or GLP1  $10^{-7}M$ . Insulin levels were measured in supernatants after 30  
199 min of incubation. The effect of Imeglimin at 100  $\mu M$  was significant, \* $p < 0.05$ , vs. high glucose  
200 alone; mean  $\pm$  SEM;  $n = 9-10$  wells with 6 islets per well (note that when using an unpaired Student t-  
201 test, GLP1 also achieved statistical significance,  $p = 0.0054$ ).

202



203 GSIS in GK rat islets was markedly impaired vs. a 2-fold response to high glucose in control  
204 Wistar islets (Fig. 2A). Imeglimin potentiated GSIS; similar to the results obtained using N0STZ rat  
205 islets, Imeglimin was without any effect at low glucose (Fig. S1). A dose-related effect was also  
206 evident with a magnitude similar to GLP1 (Fig. 2B). Under the same experimental conditions, we  
207 confirmed that metformin could not enhance GSIS (Fig 2C). The effect of 100  $\mu$ M Imeglimin to  
208 amplify insulin secretion in the presence of high glucose was replicated in 6 additional experiments  
209 (S1 Table). Using a perfusion system (Fig. 2D), Imeglimin was also shown to augment GSIS. In this  
210 context, the response to high glucose in control GK rat islets was negligible whereas islets from  
211 healthy Wistar rats were robustly responsive (Fig. S2). Imeglimin resulted in a partial restoration of  
212 GSIS relative to the response noted in Wistar rat islets (compare Fig. 2D and Fig. S2).

213

## 214 **Fig 2. Imeglimin Amplifies Insulin Secretion in Islets from GK Rats**

215 GK Rat Islets vs. (Control) Wistar Rat Islets (A). Islets from GK and Wistar rats were  
216 incubated in the presence of glucose 2.8 mM or 16.7 mM. Insulin levels were measured after 20 min  
217 of incubation. \* $p < 0.05$ , \*\* $p < 0.01$ , \*\*\* $p < 0.001$  vs. respective control value; mean  $\pm$  SEM; n=6 wells  
218 with 6-10 islets per well.

219 Imeglimin (but not Metformin) Amplifies Insulin Secretion from GK Rat Islets: Islets from  
220 GK rats were incubated in the presence of high (16.7 mM) glucose (grey bars) or with high glucose  
221 plus the indicated concentrations of Imeglimin (B; open bars), metformin (C; yellow bars), or GLP1  
222 as a control (blue bars; panels B and C). Significant increases in mean ( $\pm$  SEM) glucose-stimulated  
223 insulin release are noted vs. respective control values; \* $p < 0.05$ , \*\* $p < 0.01$ , \*\*\* $p < 0.001$ ; n=15 to 16  
224 observations per group.

225 Effects of Imeglimin on Kinetics of Insulin Secretion from GK Rat Islets (D). Islets from GK  
226 rats were alternately perfused with 2.8 mM glucose for 10 minutes and 16.7 mM glucose with (red  
227 curve) or without (black curve) Imeglimin (100 $\mu$ M) for 10 minutes (10 to 20 min) followed by  
228 perfusion with 2.8mM for an additional 10 minutes. The insulin levels in the perfusate was measured  
229 every minute from 0 min to 30 min. Mean  $\pm$  SEM insulin levels are shown (data are derived from 4  
230 independent experiments for each group at each time point).

231 In cadaveric islets derived from a single patient donor with Type 2 diabetes, we also observed  
232 an effect (+129%,  $p < 0.05$ ;  $n = 8-10$ ) of Imeglimin (100  $\mu\text{M}$ ) to amplify GSIS (Fig. S3).

233

### 234 **Imeglimin's Actions are Distinct vs. Other Glucose-Dependent Mechanisms**

235 The combination of Imeglimin with GLP1 resulted in trends towards greater GSIS (Fig. S4).  
236 These results suggest that Imeglimin and GLP1 may be acting via independent pathways to amplify  
237 insulin release. To confirm this hypothesis, we excluded an effect of Imeglimin on cAMP, the  
238 classical mediator of GLP1 action, under the same conditions where GLP1 exerted a strong effect  
239 (Fig. 3). In  $\beta$ -cells, phospholipase C (PLC) also mediates the potentiation of insulin secretion in  
240 response to molecules that include GPR40 (free fatty acid receptor 1) agonists that potentiate GSIS  
241 (14). We excluded a role for PLC via use of a specific PLC inhibitor (15)(Fig. S5). These results  
242 suggest that Imeglimin and GPR40 agonists act via independent pathways to amplify insulin release.

243

### 244 **Fig 3. Imeglimin Does Not Increase cAMP Generation in Isolated GK Rat Islets**

245 In the presence of high glucose and the phosphodiesterase inhibitor IBMX, GLP1 (0.1  $\mu\text{M}$ )  
246 treatment increased the cAMP content of GK islets (+95%, \*\*\* $p < 0.001$ ;  $n = 9$ ). However, Imeglimin  
247 (100  $\mu\text{M}$ ), produced no effect to increase cAMP under the same conditions. Mean  $\pm$  SEM values are  
248 shown ( $n = 10$ ). An additional independent experiment was also performed; levels of cAMP in each  
249 tested condition were not different between the two experiments.

250

### 251 **Imeglimin Modulates Adenine Dinucleotide and ATP Levels**

252 Adenine dinucleotides are known to modulate insulin secretion; we found that both Imeglimin  
253 and exogenous nicotinamide induced increases in islet  $\text{NAD}^+$  content and the  $\text{NAD}/\text{NADH}$  ratio  
254 under high glucose conditions (Table I). No differences in adenine dinucleotides content were noted  
255 when low vs. high glucose alone were compared (data not shown).

257  
258  
259  
260

**TABLE I**  
**Imeglimin and Nicotinamide Effects on Adenine Dinucleotide**  
**and ATP, ADP Content of GK Rat Islets**

|                   | Control<br>16.7 mM<br>Glucose | Imeglimin<br>25 $\mu$ M              | Imeglimin<br>100 $\mu$ M                                            | Nicotinamide<br>15 mM                                              |
|-------------------|-------------------------------|--------------------------------------|---------------------------------------------------------------------|--------------------------------------------------------------------|
| NAD <sup>+</sup>  | 100 $\pm$ 5<br>100 $\pm$ 8    | <b>155 <math>\pm</math> 18*</b><br>- | 123 $\pm$ 15<br><b>131 <math>\pm</math> 11#</b>                     | <b>204 <math>\pm</math> 30***</b><br>130 $\pm$ 14                  |
| NADH              | 100 $\pm$ 3<br>100 $\pm$ 1    | 111 $\pm$ 9<br>-                     | 113 $\pm$ 13<br>100 $\pm$ 1                                         | 123 $\pm$ 12<br>105 $\pm$ 2                                        |
| NAD/NADH          | 100 $\pm$ 5<br>100 $\pm$ 8    | 154 $\pm$ 26<br>-                    | <b>130 <math>\pm</math> 18#</b><br><b>131 <math>\pm</math> 9#</b>   | <b>180 <math>\pm</math> 24**#</b><br>124 $\pm$ 13                  |
| NADP <sup>+</sup> | 100 $\pm$ 2<br>100 $\pm$ 4    | 109 $\pm$ 2<br>-                     | 101 $\pm$ 3<br>114 $\pm$ 5                                          | <b>116 <math>\pm</math> 5**</b><br><b>127 <math>\pm</math> 7**</b> |
| NADPH             | 100 $\pm$ 0<br>100 $\pm$ 1    | 98 $\pm$ 1<br>-                      | 94 $\pm$ 3<br>104 $\pm$ 2                                           | 94 $\pm$ 3<br>106 $\pm$ 3                                          |
| NADP/NADPH        | 100 $\pm$ 1<br>100 $\pm$ 3    | <b>110 <math>\pm</math> 2**</b>      | 108 $\pm$ 3<br>109 $\pm$ 6                                          | <b>125 <math>\pm</math> 4***</b><br><b>121 <math>\pm</math> 7*</b> |
|                   |                               |                                      |                                                                     |                                                                    |
| ATP               | 100 $\pm$ 4<br>100 $\pm$ 11   | -                                    | <b>145 <math>\pm</math> 5***</b><br><b>230 <math>\pm</math> 21*</b> | -                                                                  |
| ADP               | 100 $\pm$ 8<br>100 $\pm$ 9    | -                                    | 103 $\pm$ 8<br>102 $\pm$ 9                                          | -                                                                  |
| ATP/ADP           | 100 $\pm$ 9<br>100 $\pm$ 0    | -                                    | <b>142 <math>\pm</math> 10**</b><br><b>220 <math>\pm</math> 19*</b> | -                                                                  |

261  
262 Islets from GK rats were incubated in the presence of 16.7 mM glucose with or without Imeglimin or  
263 Nicotinamide. Mean  $\pm$  SEM values (n=15 samples per group) are presented as the percentage of control. For  
264 measurements of NAD<sup>+</sup>, NADH, NADP<sup>+</sup>, and NADPH, mean values for each of two sets of experiments are  
265 shown separately (one with three experiments - 3 batches of islets; a second with two experiments - 2 batches  
266 of islets). ATP and ADP levels were determined in independent experiments with two separate batches of islets  
267 (n=10 samples per group). Statistically significant results are noted in bolded text; \*p<0.05, \*\*p<0.01,  
268 \*\*\*p<0.001. An unpaired Student t test was used for selected comparisons; #p<0.05, ##p<0.01 vs. control.

269

270 As NAD<sup>+</sup> is an essential co-factor for mitochondrial function (16), we also measured ATP  
271 levels. The measurement of islet ATP content was validated by assessing the acute (10 min.) effect  
272 of exposure to high (16.7 mM) vs. low (2.8 mM) glucose alone; a +47 ± 10% increase in ATP was  
273 measurable in this context (p<0.05; n=14-16 observations in each group). In the presence of high  
274 glucose, Imeglimin significantly increased mean ATP content and the ATP/ADP ratio (Table I). The  
275 effect of metformin was also characterized; no such effect was detected with metformin (Fig. S6). To  
276 confirm that increases in islet NAD<sup>+</sup> are sufficient to amplify GSIS in diseased islets, we showed that  
277 insulin secretion and NAD<sup>+</sup> content were increased by exogenous nicotinamide (Fig. S7).

278

#### 279 **Increased NAD<sup>+</sup> via the Salvage Pathway - Increases in NAMPT Expression and Activity**

280 To assess if increases in the NAD<sup>+</sup> pool are due to enhanced synthesis, we used Gallotannin,  
281 an inhibitor of nicotinamide mononucleotide adenylyl transferase (NMNAT), a key enzyme in the  
282 NAD<sup>+</sup> synthetic pathway (17, 18). Gallotannin (10μM) alone had no effect on NAD<sup>+</sup>. As expected,  
283 Imeglimin or 15 mM nicotinamide increased NAD<sup>+</sup> levels (Fig. 4A). With Gallotannin co-  
284 administration, NAD<sup>+</sup> content in Imeglimin treated islets was no longer above control levels and  
285 NAD<sup>+</sup> content in nicotinamide treated islets was partially suppressed. These results suggest that the  
286 effect of Imeglimin on NAD<sup>+</sup> content is mediated by increased synthesis.

287

#### 288 **Fig 4. Imeglimin Increases the NAD<sup>+</sup> Pool Through Increased Synthesis**

289 Gallotannin Effect on NAD<sup>+</sup> (A). Islets from GK rats were incubated in the presence of 16.7  
290 mM glucose with or without Imeglimin (100μM), or nicotinamide (15mM); compounds were  
291 administered alone or in combination with gallotannin (10μM). NAD<sup>+</sup> was measured after 20 min  
292 incubation; mean (n=10 in each group) ± SEM values are shown; \*p<0.05, \*\*\*p<0.001 vs. Control;  
293 ## p<0.01 vs. nicotinamide alone.

294 iNAMPT Activity (B). Islets from GK rats were incubated in the presence of 16.7 mM glucose

295 with or without Imeglimin (100 $\mu$ M), or nicotinamide (2 mM or 15 mM), or the combination of  
296 Imeglimin and 2 mM nicotinamide. Intracellular (i) NAMPT activity was then measured; mean  $\pm$   
297 SEM (n=5-6 per group) values are shown. \*p<0.05, \*\*p<0.01 vs. Control.

298 NAMPT mRNA Levels (C). Results from two separate experiments (Right and Left panels)  
299 are shown. NAMPT gene expression was determined by RT-PCR in islets from GK rats that were  
300 incubated for 30 min. in the presence of 2.8 mM glucose (hatched bar), 16.7 mM glucose (solid bars)  
301 or 16.7 mM glucose plus Imeglimin (100 $\mu$ M; open bars). Mean ( $\pm$  SEM; n=9-10 observations per  
302 group) levels of NAMPT mRNA are shown as fold vs. 16.7 mM glucose alone; #p<0.05 vs. 2.8 mM  
303 glucose; \*p<0.05; \*\*\*p<0.001 vs. 16.7 mM glucose.

304  
305 At a low concentration (2 mM), the NAMPT substrate – nicotinamide - appeared to potentiate  
306 the effect of Imeglimin on GSIS (+89% vs. +33% with Imeglimin alone; data not shown). Given this  
307 result, the activity of intracellular NAMPT, a key enzyme in the NAD<sup>+</sup> salvage synthesis pathway,  
308 was assessed (Fig. 4B). As expected, iNAMPT activity was greater with 15 mM nicotinamide  
309 (+117%, p<0.01) and not significantly increased at 2 mM. In the absence of NAMPT substrate  
310 (nicotinamide), Imeglimin did not significantly modify iNAMPT activity; however, with 2 mM  
311 nicotinamide, iNAMPT activity was increased by Imeglimin (+88%, p<0.05 vs. control). These  
312 findings were replicated in an experiment where iNAMPT activity was induced by the combination  
313 of Imeglimin (100  $\mu$ M) and 1 mM nicotinamide (+42%; p<0.05 vs. both control and nicotinamide  
314 alone; data not shown). Thus, in the presence of low concentrations of added substrate, Imeglimin  
315 leads to increased NAMPT activity. The possible effect of Imeglimin to directly modulate human  
316 recombinant NAMPT activity was also assessed. Recombinant NAMPT enzyme activity was not  
317 altered by Imeglimin at six different concentrations (Fig. S8).

318 Since glucose rapidly induces NAMPT expression in isolated human islets (19); the potential  
319 for Imeglimin to upregulate NAMPT mRNA was interrogated. High glucose alone modestly  
320 induced NAMPT mRNA levels; added exposure to Imeglimin further increased NAMPT mRNA (Fig

321 4C).

322

### 323 **Imeglimin's Effects are Distinct vs. Sulphonylureas**

324 Diazoxide opens  $K^+$ -ATP channels to inhibit GSIS (20, 21); sulphonylureas including  
325 tolbutamide mediate channel closure and glucose-independent insulin secretion (22). As expected,  
326 tolbutamide (and glibenclamide) increased insulin secretion (Fig. 5A; Fig. S9); diazoxide was also  
327 shown to inhibit the effect of tolbutamide (Fig. 5A). Control experiments also showed that GK rat  
328 islets retain the ability to respond to KCl (Fig. S10). Imeglimin's effect to augment GSIS was  
329 unaffected by diazoxide (Fig. 5B). Taken together with the absence of an Imeglimin effect on insulin  
330 secretion in low glucose, these results further suggest that Imeglimin's mode of action is distinct from  
331 sulphonylureas and may involve a pathway(s) that is independent of  $K^+$ -ATP channels.

332

333 **Fig 5. Imeglimin Effect on Insulin Secretion is Resistant to Diazoxide.** (A) Islets from GK rats  
334 were incubated in low (2.8 mM) glucose with or without diazoxide (400  $\mu$ M), tolbutamide (500  $\mu$ M),  
335 or a combination of both diazoxide and tolbutamide. (B) GK rat islets were incubated in high (16.7  
336 mM) glucose with or without diazoxide (400  $\mu$ M), Imeglimin (100  $\mu$ M), or a combination of both  
337 diazoxide and Imeglimin. Samples were obtained after 20 min. and subsequently assayed to determine  
338 insulin concentrations; \* $p < 0.05$ , \*\* $p < 0.01$ , vs. respective control value. Mean  $\pm$  SEM values are  
339 shown.

340

### 341 **Potential Role of a CD38-cADPR-Ryanodine Receptor Pathway in $NAD^+$ Mediated** 342 **Mobilization of Intracellular $Ca^{2+}$**

343 As expected, we also observed that Imeglimin could induce increases in intracellular  $Ca^{2+}$  in  
344 response to glucose in GK islets (Fig. 6A). This effect on intracellular  $Ca^{2+}$  was also not observed in  
345 low glucose conditions (Fig. S11). We have also observed that glucose-induced  $Ca^{2+}$  mobilization

346 in GK rat islets is impaired by more than 85% vs. Wistar rat islets studied in parallel in a perfusion  
347 assay (Fig. S10).

348

349 **Fig 6. Potential Role of CD38 and NAD<sup>+</sup> Metabolites to Enhance Insulin Secretion via**  
350 **Increasing Intracellular Ca<sup>2+</sup> in Response to Glucose**

351 Measurement of Intracellular Ca<sup>2+</sup> in Perfused GK Rat Islets (A). Islets from GK rats were  
352 perfused alternately with glucose 2.8 mM and 16.7 mM glucose without treatment for Controls (black  
353 curve), with Imeglimin 100 μM (red curve) or with GLP1 0.1 μM (green curve) followed by a third  
354 period of perfusion with 2.8 mM glucose alone. Intracellular Ca<sup>2+</sup> levels were measured from  
355 individual islets by successive excitation at 340 nm and 380 nm and detection of fluorescence emitted  
356 at 510 nm every 10 seconds. Results for each of the three groups (control, Imeglimin, GLP1) are  
357 derived from 8 experiments with a total of 8 to 10 rats per group (8 rats for control and GLP1 groups,  
358 10 for the Imeglimin group).

359 Insulin Secretion Response to Imeglimin and GLP1 With and Without CD38 Knockdown:  
360 Scrambled sequence siRNA control (SC-Control, solid bars) and CD38 siRNA (open bars)  
361 transfected GK rat islets were incubated for 20 min. in high (16.7 mM) glucose with or without 100  
362 μM Imeglimin (B) or 0.1 μM GLP (C). Mean ± SEM (n=15-20 per group) insulin release values are  
363 shown; \*p<0.05 vs. respective control.

364

365 NAD<sup>+</sup> is metabolized to cyclic ADP-ribose (cADPR) and nicotinic acid dinucleotide  
366 phosphate (NAADP) via CD38 (cyclic ADP ribose hydrolase). Both metabolites are implicated in  
367 mobilizing internal Ca<sup>2+</sup> stores, through activation of ER ryanodine receptors in the case of cADPR.

368 To assess the role of CD38, siRNA-mediated knockdown was employed. CD38 siRNA  
369 produced significant and reproducible decreases in CD38 mRNA (from -40% to -49%, p<0.01-0.05;  
370 n=14-18 observations per group) vs. control siRNA (data not shown). When CD38 mRNA expression  
371 was only moderately reduced, Imeglimin's effect on GSIS was abolished (Fig. 6B). In contrast, effects  
372 of GLP1 treatment were unaffected and there was no effect with scrambled (control) siRNA (Fig.

373 6C). These results suggest that CD38 is required for the effect of Imeglimin to potentiate GSIS.

374 Finally, we studied the effects of modulating signaling via cADPR or NAADP on insulin  
375 release (Table II). GLP1 and Imeglimin produced expected GSIS effects and exogenous cADPR (1.0  
376  $\mu\text{M}$ ) also increased GSIS. cADPR's effects to enhance  $\text{Ca}^{2+}$  mobilization (and GSIS) are reportedly  
377 mediated by ryanodine receptors (RyR)(23); thus, high concentration ryanodine was used as a RyR  
378 inhibitor. In the presence of 200  $\mu\text{M}$  ryanodine, the effects of either cADPR or Imeglimin to augment  
379 GSIS appeared to be abrogated (Table II). However, baseline glucose-stimulated insulin release was  
380 also modestly lower in the presence of 200  $\mu\text{M}$  ryanodine vs. without ryanodine, thus complicating  
381 the interpretation of these data. Overall, these data suggest a role for cADPR in contributing to  
382 Imeglimin's effects to amplify glucose-stimulated  $\text{Ca}^{2+}$  mobilization and insulin secretion.

383



385  
386  
387  
388

**TABLE II**  
**Effects of Modulating cADPR**  
**on Glucose-Stimulated Insulin Secretion**

| Treatment Group         | Insulin Secretion   |                              | p value(s)             |
|-------------------------|---------------------|------------------------------|------------------------|
|                         | pmol/L.islet.20 min | % of 16.7 mM Glucose Control |                        |
| Control 16.7 mM Glucose | 5.1 ± 0.8           | 100 ± 15                     | -                      |
| GLP1 (0.1 μM)           | <b>14.1 ± 1.5</b>   | <b>274 ± 29</b>              | <b>&lt;0.001*</b>      |
| Imeglimin (100 μM)      | <b>7.8 ± 0.7</b>    | <b>152 ± 13</b>              | <b>&lt;0.05*</b>       |
| cADPR (1.0 μM)          | <b>7.3 ± 0.5</b>    | <b>143 ± 10</b>              | <b>&lt;0.05*</b>       |
| Ryanodine (200 μM)      | 3.2 ± 0.3           | 63 ± 6                       | NS                     |
| cADPR + Ryanodine       | <b>4.3 ± 0.4</b>    | <b>84 ± 8</b>                | NS*; <b>&lt;0.001#</b> |
| Imeglimin + Ryanodine   | <b>5.4 ± 0.8</b>    | <b>105 ± 15</b>              | NS*; <b>&lt;0.05#</b>  |

389

390 Islets from GK rats were incubated in the presence of 16.7 mM glucose for 20 min. with or without the indicated  
391 compounds as shown; effects pathway inhibition (excess ryanodine) - with or without cADPR or Imeglimin  
392 stimulation - are depicted in the lower portion of the table. Mean ± SEM values for insulin released  
393 (pmol/L.islet.20 min; also presented as % of 16.7 mM glucose control) are shown (n=8-13 observations per  
394 group). Bolded values are statistically significant; p values vs. 16.7 mM glucose control (\*) or vs. the respective  
395 single compound in combination treatments (#, first agent listed in Column one) are noted.

396  
397

## 398 DISCUSSION

399 The prominent role of β-cell dysfunction in Type 2 diabetes is well established (24–28). Here,  
400 we elucidated a novel mechanism by which Imeglimin, a new potential anti-diabetic medication,  
401 improves β-cell function – an effect that has been clearly demonstrated *in vivo* in both animal models  
402 (6,8) and humans (9).

403 Imeglimin ameliorates hyperglycemia in rodent models characterized by a primary β-cell

404 defect – STZ-diabetic and GK rats (6). Here, we determined that Imeglimin could acutely and directly  
405 enhance GSIS (without any effect in low glucose conditions) with isolated islets from these models.  
406 Concentrations where Imeglimin was effective (25-100  $\mu$ M) are also aligned with human exposure  
407 levels (estimated  $\approx$  50  $\mu$ M, unpublished; Poxel SA).

408 Several observations indicate that Imeglimin's mechanism is distinct vs. other therapeutic  
409 approaches. It is important to distinguish the effects of Imeglimin from metformin since in liver  
410 there is an apparent overlap with respect to inhibition of gluconeogenesis and the potential to partially  
411 inhibit mitochondrial Complex I (6,7). We confirmed that metformin fails to directly potentiate GSIS,  
412 consistent with the literature (29,30); in addition, metformin had no effect on GK islet ATP (vs.  
413 significant increases with Imeglimin). GLP1 binding to its cognate G-protein coupled receptor  
414 induces rapid activation of plasma membrane associated adenylyl cyclase leading to clear increases  
415 in cAMP (2,31); Imeglimin had no such effect. Sulphonylureas such as tolbutamide, are  
416 secretagogues in both low- and high-glucose; in contrast, the effects of Imeglimin (like GLP1) are  
417 only glucose-dependent. We also found that, unlike sulphonylureas, Imeglimin's effect on GSIS was  
418 retained in the presence of diazoxide, a classical  $\beta$ -cell  $K^+$ -ATP channel opener (32). Together with  
419 the observed lack of effect on insulin secretion under low glucose conditions in this and prior (8)  
420 studies, these findings are consistent with the likelihood of a  $K^+$ -ATP independent mechanism for  
421 Imeglimin. Importantly, the GSIS enhancing effects of incretins like GLP1 also involve a diazoxide-  
422 resistant  $K^+$ -ATP independent pathway (33). GPR40 agonists and molecules in the imidazoline class  
423 have been pursued as GSIS enhancing therapies; these agents operate through PLC activation (14,34)  
424 which was also excluded a requirement for Imeglimin's action.

425 Mitochondrial dysfunction is a key feature of  $\beta$ -cell dysfunction (35-37); decreases in ATP  
426 generation have been described in islets from GK rats and patients with Type 2 diabetes (35, 38–40).

427 We previously showed that Imeglimin can modulate mitochondrial function in liver (7). In islets from  
428 healthy rats, Imeglimin was shown to amplify insulin secretion in response to obligate mitochondrial  
429 fuels (8). Here, we showed that Imeglimin increased islet ATP levels, an effect that may be consistent  
430 with the potential to enhance mitochondrial metabolism. The lack of diazoxide inhibition of  
431 Imeglimin's effect is still compatible with enhanced mitochondrial function since it is well known  
432 that additional anaplerotic mitochondrial metabolic cycles also mediate GSIS without requiring  
433 downstream K<sup>+</sup>-ATP channel closure (41).

434         Given its known roles in mitochondrial function, we measured NAD<sup>+</sup> and demonstrated an  
435 increase with Imeglimin, and with nicotinamide, a substrate for NAD<sup>+</sup> production. Importantly,  
436 exogenous nicotinamide was previously shown to enhance GSIS in rodent and human islets (42–44).  
437 We confirmed this effect and showed that providing additional substrate for NAD<sup>+</sup> synthesis – low  
438 nicotinamide concentrations – appeared to act in concert with Imeglimin to augment GSIS. These  
439 results suggest that pathways emanating from NAD<sup>+</sup> remain competent in GK islets and may be  
440 involved in mediating Imeglimin's efficacy. NAD<sup>+</sup> biogenesis occurs via *de novo* synthesis from  
441 tryptophan or the salvage pathway from nicotinamide via NAMPT (16,45). Gallotannin, which  
442 inhibits NAD<sup>+</sup> synthesis via both pathways (17,18), was used to provide further results suggesting  
443 that Imeglimin's effect to increase the NAD<sup>+</sup> pool involves new synthesis of NAD<sup>+</sup>. We also excluded  
444 a direct effect of Imeglimin on NAMPT activity *in vitro*. The effect of Imeglimin to induce NAMPT  
445 gene expression and activity is intriguing but it is uncertain if this fully accounts for the net increase  
446 in NAD<sup>+</sup> given the short time frame within which these effects were seen. Relevance of the potential  
447 role of NAMPT is underscored by studies showing NAMPT expression in β-cells (including human)  
448 and that NAMPT haplodeficiency impairs GSIS in mice (19,46).

449         Increased intracellular Ca<sup>2+</sup> is critical for insulin granule exocytosis; Ca<sup>2+</sup> sources include  
450 both extracellular (via voltage-gated channels in response to K<sup>+</sup>-ATP closure) and intracellular pools

451 (31,48,49). Having observed that Imeglimin can augment Ca<sup>2+</sup> mobilization, we assessed a potential  
452 link to NAD<sup>+</sup> generation. In addition to other roles (45,50), metabolism of NAD<sup>+</sup> by CD38 generates  
453 key second messengers – cADPR and NAADP - that are implicated in Ca<sup>2+</sup> signaling (45,51).  
454 Increases in cADPR, in turn, can activate ryanodine receptors resulting in mobilization of Ca<sup>2+</sup> stores  
455 from ER (23,49) and this pathway is reportedly operative in pancreatic β-cells (51,52). Our results  
456 suggest that Imeglimin's mechanism is dependent on components of this pathway. However, the  
457 efficiency of CD38 knockdown was limited and additional studies will be required to confirm and  
458 extend these findings. Although CD38 is described as an ectoenzyme (17), it also exists in an inward  
459 orientation and can consume intracellular NAD<sup>+</sup> (17,53). This pathway is highlighted by increases in  
460 islet cADPR and GSIS resulting from β-cell-specific CD38 overexpression in mice (54). However,  
461 we acknowledge cADPR's role in islet function is controversial; especially given an inability to  
462 consistently show that cADPR drives Ca<sup>2+</sup> release (55). Some of these discrepancies may have  
463 resulted from differences in species and methodologies (51).

464 In assessing the potential role of an NAD<sup>+</sup> mediated effect to enhance Ca<sup>2+</sup> mobilization, our  
465 experiments were limited by an inability to measure levels of cADPR in islets from this diabetic rat  
466 model, not further interrogating the possible role of NAADP or showing a direct correlation between  
467 changes in Ca<sup>2+</sup> and the apparent effects of modulating CD38 or RyR. Our studies were also  
468 restricted to short time points and may have missed additional, later, effects. There is also a clear need  
469 to more precisely define a direct molecular target(s) for Imeglimin including mechanism(s) that may  
470 be responsible for induction of NAMPT gene expression.

471 In summary, we have demonstrated a direct and acute effect of Imeglimin to augment GSIS  
472 in diseased islets from a rat model that closely resembles human Type 2 diabetes. The potential mode  
473 of action we propose (Fig. 7) involves a pathway leading to increased NAD<sup>+</sup> content which has been

474 implicated in the regulation of intracellular Ca<sup>2+</sup> and is distinct from that employed with other classes  
475 of antidiabetic medications including incretin mimetics, sulphonylureas, and biguanides. Additional  
476 studies will be required to assess the extent to which pathways implicated in the present studies are  
477 also modulated by Imeglimin in human islets. The results reported here are also consistent with  
478 existing clinical data where Imeglimin has been shown to enhance GSIS and effectively treat  
479 hyperglycemia without any additional risk of hypoglycemia.

480

### 481 **Fig 7. Proposed Model for Mechanism of Imeglimin Action in Islet $\beta$ -Cells**

482 The effects of Imeglimin in the context of glucose stimulation are highlighted in red (text  
483 and arrows).

484

### 485 **ACKNOWLEDGEMENTS**

486 The authors thank Christopher Newgard (Duke University Molecular Physiology Institute, Durham  
487 NC) and Johan Auwerx (Laboratory of Integrative Systems Physiology, EPFL, Lausanne,  
488 Switzerland) for their helpful comments.

489

### 490 **REFERENCES**

491

- 492 1. Kahn SE, Cooper ME, Del Prato S. Pathophysiology and treatment of type 2 diabetes:  
493 Perspectives on the past, present, and future. *The Lancet* 2014; 383:1068–1083.
- 494 2. Drucker DJ. Mechanisms of action and therapeutic application of glucagon-like peptide-1.  
495 *Cell Metab* 2018; 27:740–756.
- 496 3. Pirags V, Lebovitz H, Fouqueray P. Imeglimin, a novel glimin oral antidiabetic, exhibits a  
497 good efficacy and safety profile in type 2 diabetic patients. *Diabetes Obes Metab* 2012;  
498 14:852–858.
- 499 4. Fouqueray P, Pirags V, Inzucchi SE, Bailey CJ, Schernthaner G, Diamant M, et al. The

- 500 efficacy and safety of Imeglimin as add-on therapy in patients with type 2 diabetes  
501 inadequately controlled with metformin monotherapy. *Diabetes Care* 2013; 36:565–568.
- 502 5. Fouqueray P, Pirags V, Diamant M, Schernthaner G, Lebovitz HE, Inzucchi SE, et al. The  
503 efficacy and safety of Imeglimin as add-on therapy in patients with type 2 diabetes  
504 inadequately controlled with sitagliptin monotherapy. *Diabetes Care*. 2014; 37:1924–1930.
- 505 6. Fouqueray P, Leverve X, Fontaine E, Baquié M, Wollheim C., et al. Imeglimin - A new oral  
506 anti-diabetic that targets the three key defects of type 2 diabetes. *J Diabetes Metab* 2011;  
507 02:126 [doi:10.4172/2155-6156.1000126].
- 508 7. Vial G, Chauvin MA, Bendridi N, Durand A, Meugnier E, Madec AM, et al. Imeglimin  
509 normalizes glucose tolerance and insulin sensitivity and improves mitochondrial function in  
510 liver of a high-fat, high-sucrose diet mice model. *Diabetes* 2015; 64:2254–2264.
- 511 8. Perry RJ, Cardone RL, Petersen MC, Zhang D, Fouqueray P, Hallakou-Bozec S, et al.  
512 Imeglimin lowers glucose primarily by amplifying glucose-stimulated insulin secretion in  
513 high-fat-fed rodents. *Am J Physiol - Endocrinol Metab* 2016; 311:E461–E470.
- 514 9. Pacini G, Mari A, Fouqueray P, Bolze S, Roden M. Imeglimin increases glucose-dependent  
515 insulin secretion and improves  $\beta$ -cell function in patients with type 2 diabetes. *Diabetes Obes*  
516 *Metab* 2015; 17:541–555.
- 517 10. Portha B, Giroix M-H, Tourrel-Cuzin C, Le-Stunff H, Movassat J. The GK rat: a prototype  
518 for the study of non-overweight Type 2 diabetes. In: *Animal Models in Diabetes Research*.  
519 Humana Press; 2012. p. 125–159.
- 520 11. Portha B, Levacher C, Picon L, Rosselin G. Diabetogenic effect of streptozotocin in the rat  
521 during the perinatal period. *Diabetes* 1974; 23:889–895.
- 522 12. Portha B, Picon L, Rosselin G. Chemical diabetes in the adult rat as the spontaneous  
523 evolution of neonatal diabetes. *Diabetologia* 1979; 17:371–377.

- 524 13. Efanov AM, Zaitsev S V., Mest HJ, Raap A, Appelskog IB, Larsson O, et al. The novel  
525 imidazoline compound BL11282 potentiates glucose-induced insulin secretion in pancreatic  
526  $\beta$ -cells in the absence of modulation of KATP channel activity. *Diabetes* 2001; 50:797–802.
- 527 14. Yamada H, Yoshida M, Ito K, Dezaki K, Yada T, Ishikawa SE, et al. Potentiation of glucose-  
528 stimulated insulin secretion by the GPR40-PLC-TRPC pathway in pancreatic  $\beta$ -cells. *Sci Rep*  
529 2016; 6:2–10.
- 530 15. Bleasdale JE, Thakur NR, Gremban RS, Bundy GL, Fitzpatrick FA, Smith RJ, et al. Selective  
531 inhibition of receptor-coupled phospholipase C-dependent processes in human platelets and  
532 polymorphonuclear neutrophils. *J Pharmacol Exp Ther* 1990; 255:756–768.
- 533 16. Katsyuba E, Mottis A, Zietak M, et al. De novo NAD<sup>+</sup> synthesis enhances mitochondrial  
534 function and improves health. *Nature* 2018; 563:354-359.
- 535 17. Liu L, Su X, Quinn WJ, Hui S, Krukenberg K, Frederick DW, Redpath P, et al. Quantitative  
536 analysis of NAD synthesis-breakdown fluxes. *Cell Metab* 2018; 27:1067-1080.
- 537 18. Petrelli R, Felczak K, Cappellacci L. NMN/NaMN adenylyltransferase (NMNAT) and NAD  
538 kinase (NADK) inhibitors: Chemistry and potential therapeutic applications. *Curr Med Chem*  
539 2011; 18:1973–1992.
- 540 19. Kover K, Tong PY, Watkins D, Clements M, Stehno-Bittel L, Novikova L, et al. Expression  
541 and regulation of Nampt in human islets. *PLoS One*. 2013; 8:1–11.
- 542 20. Burr IM, Marliss EB, Stauffacher W, Renold AE. Diazoxide effects on biphasic insulin  
543 release: “adrenergic” suppression and enhancement in the perfused rat pancreas. *J Clin*  
544 *Invest*. 1971; 50:1444–1450.
- 545 21. MacDonald PE, De Marinis YZ, Ramracheya R, Salehi A, Ma X, Johnson PRV, et al. A  
546 KATP channel-dependent pathway within  $\alpha$  cells regulates glucagon release from both  
547 rodent and human islets of langerhans. *PLoS Biol*. 2007; 5:1236–1247.

- 548 22. Inagaki N, Gono T, Clement IV JP, Namba N, Inazawa J, Gonzalez G, et al. Reconstitution  
549 of IKATP: An inward rectifier subunit plus the sulfonylurea receptor. *Science* 1995;  
550 270:1166–1170.
- 551 23. Mészáros LG, Bak J, Chu A. Cyclic ADP-ribose as an endogenous regulator of the non-  
552 skeletal type ryanodine receptor Ca<sup>2+</sup> channel. *Nature* 1993; 364:76–79.
- 553 24. Kahn SE, Zraika S, Utzschneider KM, Hull RL. The beta cell lesion in type 2 diabetes: There  
554 has to be a primary functional abnormality. *Diabetologia* 2009; 52:1003–1012.
- 555 25. Deng S, Vatamaniuk M, Huang X, Doliba N, Lian MM, Frank A, et al. Structural and  
556 functional abnormalities in the islets isolated from Type 2 diabetic subjects. *Diabetes* 2004;  
557 53:624–632.
- 558 26. Del Guerra S, Lupi R, Marselli L, Masini M, Bugliani M, Sbrana S, et al. Functional and  
559 molecular defects of pancreatic islets in human type 2 diabetes. *Diabetes*. 2005; 54:727–735.
- 560 27. Butler AE, Janson J, Bonner-Weir S, Ritzel R, Rizza RA, Butler PC.  $\beta$ -cell deficit and  
561 increased  $\beta$ -cell apoptosis in humans with type 2 diabetes. *Diabetes* 2003; 52:102–110.
- 562 28. Rahier J, Guiot Y, Goebbels RM, Sempoux C, Henquin JC. Pancreatic  $\beta$ -cell mass in  
563 European subjects with type 2 diabetes. *Diabetes Obes Metab* 2008; 10 (SUPPL. 4):32–42.
- 564 29. DeFronzo RA, Barzilai N, Simonson DC. Mechanism of metformin action in obese and lean  
565 non-insulin dependent diabetic subjects. *J Clin Endocrinol Metab* 1991; 73:1294-1301.
- 566 30. Rena G, Hardie DG, Pearson ER. The mechanisms of action of metformin. *Diabetologia*.  
567 2017:1577–1585.
- 568 31. Meloni AR, Deyoung MB, Lowe C, Parkes DG.  $\beta$ -cells : Mechanism and glucose  
569 dependence. *Diabetes Obes Metab* 2013; 15:15–27.
- 570 32. Proks P, Reimann F, Green N, Gribble F, Ashcroft FA. Sulfonylurea stimulation of insulin  
571 secretion *Diabetes* 2002; 51:S368–S376.



- 572 33. Yajima H, Komatsu M, Schermerhorn T, Aizawa T, Kaneko T, Nagai M, et al. cAMP  
573 enhances insulin secretion by an action on the ATP-sensitive K<sup>+</sup> channel-independent  
574 pathway of glucose signaling in rat pancreatic islets. *Diabetes*. 1999; 48:1006–1012.
- 575 34. Efendic S, Efanov AM, Berggren P, Zaitsev SV. Two generations of insulinotropic  
576 imidazoline compounds. *Diabetes* 2002; 51:S448-S454.
- 577 35. Anello M, Lupi R, Spampinato D, Piro S, Masini M, Boggi U, et al. Functional and  
578 morphological alterations of mitochondria in pancreatic beta cells from type 2 diabetic  
579 patients. *Diabetologia* 2005; 48:282–289.
- 580 36. Ma ZA, Zhao Z, Turk J. Mitochondrial dysfunction and  $\beta$ -cell failure in type 2 diabetes  
581 mellitus. *Exp Diabetes Res* 2012; 2012: Article ID 703538; doi:10.1155/2012/703538.
- 582 37. Haythorne E, Rohm M, van de Bunt M, Brereton MF, Tarasov AI, Blacker TS, et al.  
583 Diabetes causes marked inhibition of mitochondrial metabolism in pancreatic  $\beta$ -cells. *Nat*  
584 *Comm* 2019; 10. Available from: <http://dx.doi.org/10.1038/s41467-019-10189-x>
- 585 38. Sasaki M, Fujimoto S, Sato Y, Nishi Y, Mukai E, Yamano G, et al. Reduction of reactive  
586 oxygen species ameliorates metabolism-secretion coupling in islets of diabetic GK rats by  
587 suppressing lactate overproduction. *Diabetes* 2013; 62:1996–2003.
- 588 39. Giroix MH, Vesco L, Portha B. Functional and metabolic perturbations in isolated pancreatic  
589 islets from the GK rat, a genetic model of noninsulin-dependent diabetes. *Endocrinology*  
590 1993; 132:815–822.
- 591 40. Tsuura Y, Ishida H, Okamoto Y, Kato S, Sakamoto K, Horie M, et al. Glucose sensitivity of  
592 ATP-sensitive K<sup>+</sup> channels is impaired in b-cells of the GK rat: A new genetic model of  
593 NIDDM. *Diabetes* 1993; 42:1446–1453.
- 594 41. Jensen MV, Joseph JW, Ronnebaum SM, Burgess SC, Sherry AD, Newgard CB. Metabolic  
595 cycling in control of glucose-stimulated insulin secretion. 2008; *Am J Physiol Endocrinol*

596 Metab 295: E1287-E1297.

597 42. Deery DJ, Taylor KW. Effects of azaserine and nicotinamide on insulin release and  
598 nicotinamide-adenine dinucleotide metabolism in isolated rat islets of Langerhans. *Biochem.*  
599 *J.* 1973, 134: 557-563

600 43. Otonkoski T, Beattie GM, Mally MI, Ricordi C, Hayek A. Nicotinamide is a potent inducer  
601 of endocrine differentiation in cultured human fetal pancreatic cells. *J Clin Invest* 1993;  
602 92:1459-1466.

603 44. Zawulich WS, Dye ES, Matschinsky FM. Nicotinamide modulation of rat pancreatic islet cell  
604 responsiveness in vitro. *Horm Metab Res* 1979;11:469–471.

605 45. Cantó C, Menzies KJ, Auwerx J. NAD<sup>+</sup> metabolism and the control of energy homeostasis:  
606 A balancing act between mitochondria and the nucleus. *Cell Metab* 2015; 22:31–53.

607 46. Revollo JR, Körner A, Mills KF, Satoh A, Wang T, Garten A, et al. Nampt/PBEF/Visfatin  
608 regulates insulin secretion in  $\beta$  Cells as a systemic NAD biosynthetic enzyme. *Cell Metab*  
609 2007 7:363–375.

610 47. Graves TK, Hinkle PM. Ca<sup>2+</sup>-induced Ca<sup>2+</sup> release in the pancreatic  $\beta$ -cell: Direct evidence  
611 of endoplasmic reticulum Ca<sup>2+</sup> release. *Endocrinology* 2003; 144:3565–3574.

612 48. Kang G, Holz GG. Amplification of exocytosis by Ca<sup>2+</sup>-induced Ca<sup>2+</sup> release in INS-1  
613 pancreatic  $\beta$  cells. *J Physiol* 2003; 546:175–189.

614 49. Lee HC, Walseth TF, Bratt GT, Hayes RN, Clapper DL. Structural determination of a cyclic  
615 metabolite of NAD<sup>+</sup> with intracellular Ca<sup>2+</sup>-mobilizing activity. *J Biol Chem* 1989;  
616 264:1608–1615.

617 50. Katsyuba E, Romani M, Hofer D, Auwerx J. NAD<sup>+</sup> homeostasis in health and disease.  
618 *Nature Metab* 2020; 2:9-31.

619 51. Zhao Y, Graeff R, Lee HC. Roles of cADPR and NAADP in pancreatic cells. *Acta Biochim*

- 620 Biophys Sin (Shanghai). 2012; 44: 719-729.
- 621 52. Takasawa S, Nata K, Yonekura H, Okamoto H. Cyclic ADP-ribose in insulin secretion from  
622 pancreatic  $\beta$  cells. Science 1993; 259:370–373.
- 623 53. Zhao YJ, Zhu WJ, Wang XW, Zhang L-H, Lee HC. Determinants of the membrane  
624 orientation of a calcium signaling enzyme CD38. Biochim Biophys Acta 2015; 1853:2095-  
625 2103.
- 626 54. Kato I, Takasawa S, Akabane A, Tanaka O, Abe H, Takamura T, et al. Regulatory role of  
627 CD38 (ADP-ribosyl cyclase/cyclic ADP-ribose hydrolase) in insulin secretion by glucose in  
628 pancreatic  $\beta$  cells: Enhanced insulin secretion in CD38-expressing transgenic mice. J Biol  
629 Chem. 1995; 270:30045–30050.
- 630 55. Islam MS, Berggren PO. Cyclic ADP-ribose and the pancreatic beta cell: Where do we  
631 stand? Diabetologia. 1997; 40:1480–1484.

632

633

634

### 635 **SUPPORTING INFORMATION CAPTIONS**

636 **Fig. S1 Imeglimin Effects on Insulin Release from GK Rat Islets in Low vs. High Glucose**  
637 **Conditions**

638 **S1 Table Summary of Additional Experiments Demonstrating Increased GSIS with Imeglimin**  
639 **in GK Rat Islets**

640 **Fig. S2 Comparison of GSIS in Isolated Islets from Healthy Wistar vs. Diabetic GK Rats**

641 **Fig. S3 Effect of Imeglimin on GSIS in Isolated Islets from a Patient Donor with Type 2**  
642 **Diabetes**

643 **Fig. S4 Effects of Imeglimin on GSIS in GK Rat Islets when Added to Maximal GLP1**

644 **Fig. S5 Inhibition of Phospholipase C Signaling**

645 **Fig. S6 Metformin Does Not Affect ATP Levels in Isolated GK Rat Islets**

646 **Fig. S7 Increases in NAD<sup>+</sup> Content of GK Rat Islets are Sufficient to Augment Insulin Release**

647 **Fig. S8 Imeglimin Does Not Modulate the Activity of Recombinant NAMPT**

648 **Fig. S9 Control Experiments with Diazoxide, Sulphonylureas, KCl**

649 **Fig. S10 Comparison of Intracellular Ca<sup>2+</sup> Responses to Glucose in Wistar vs. GK Rat Islets**

650 **Fig. S11 Lack of Effect of Imeglimin on Intracellular Ca<sup>2+</sup> in the Presence of Low Glucose**

651

652

653

654

655

656

657

658

659

660

# Figure 1

## A.

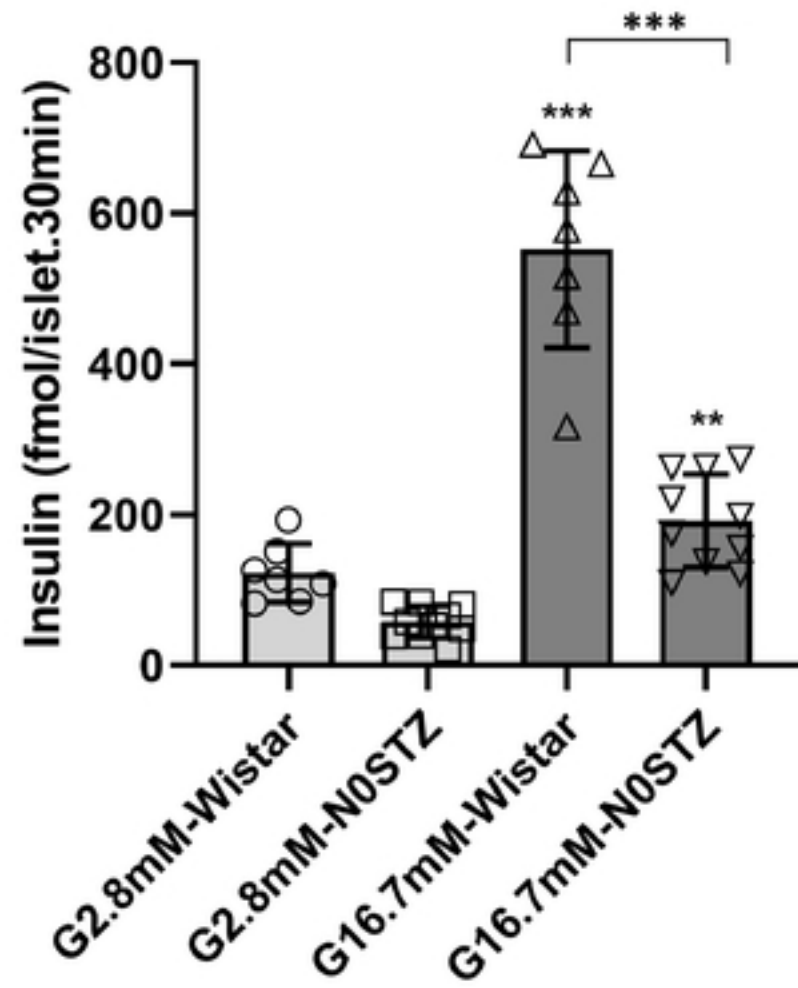

## B.

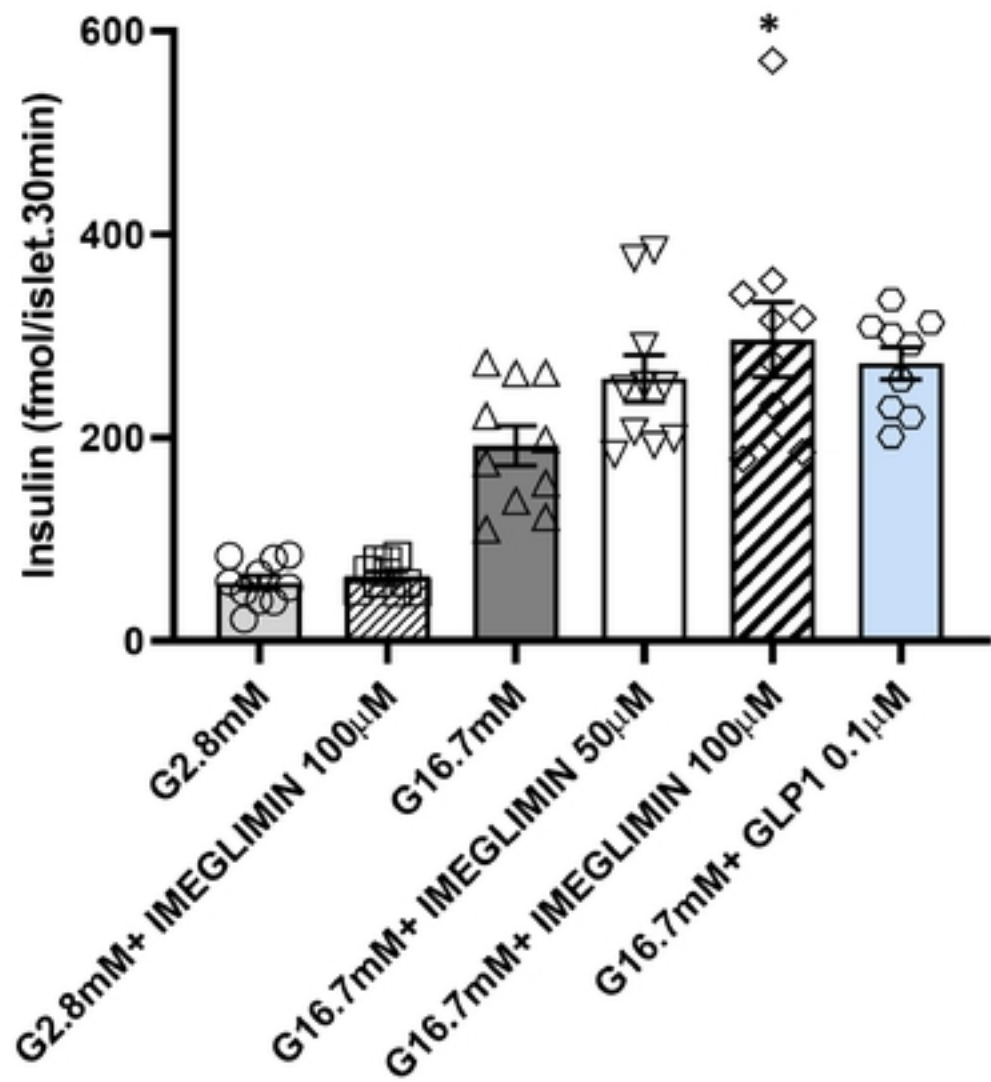

Figure

# Figure 2 A.

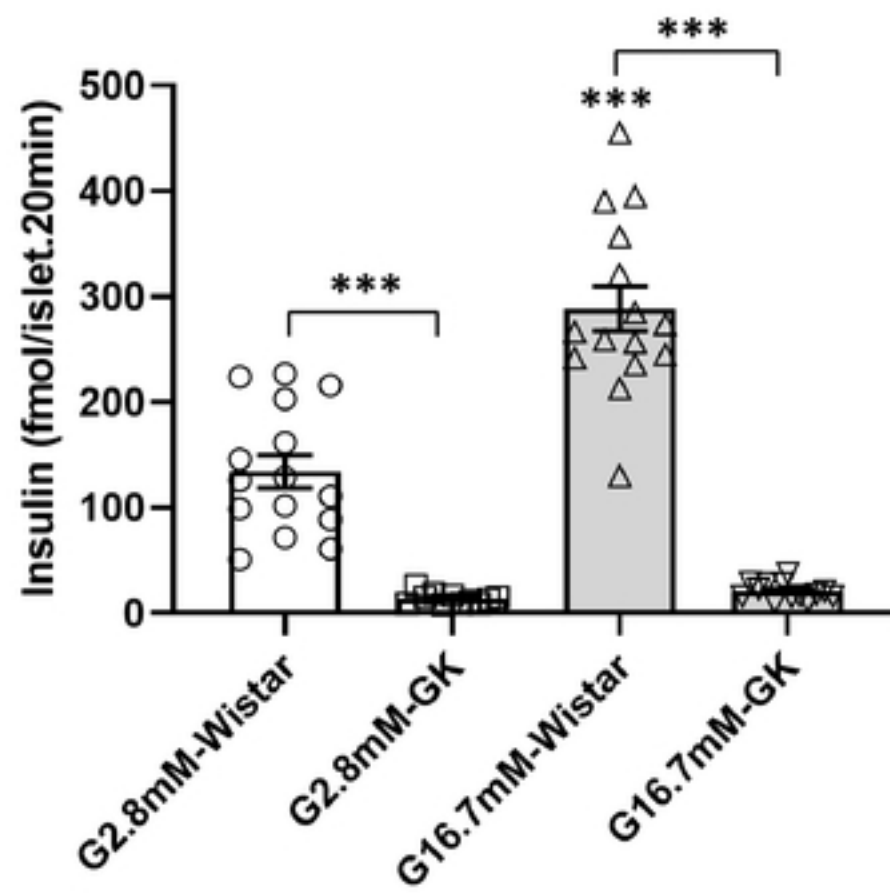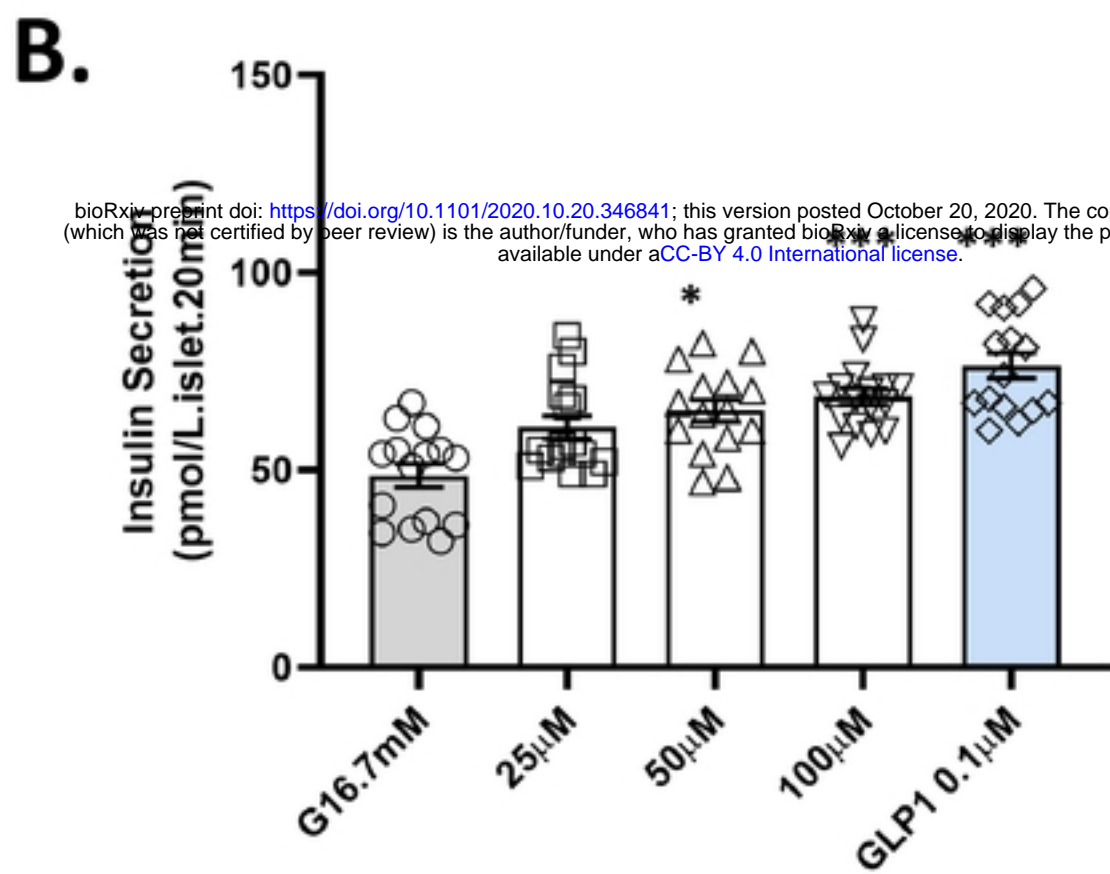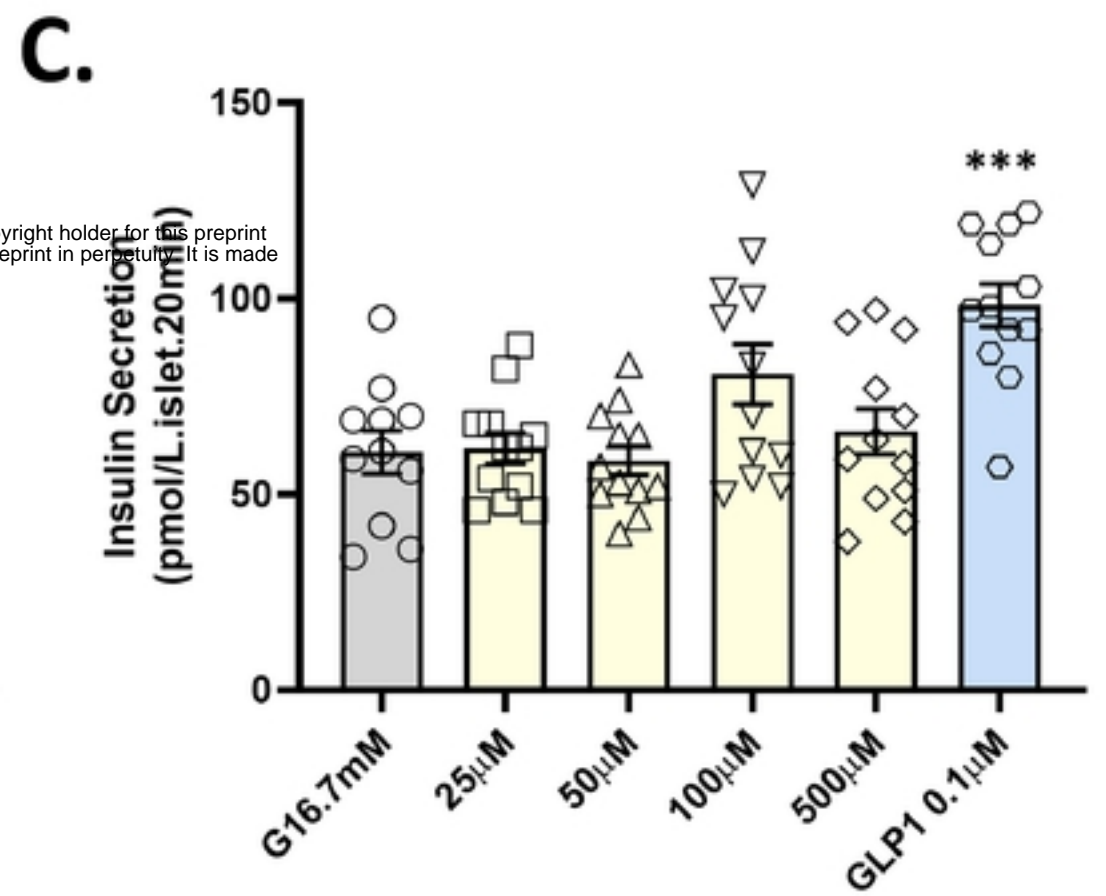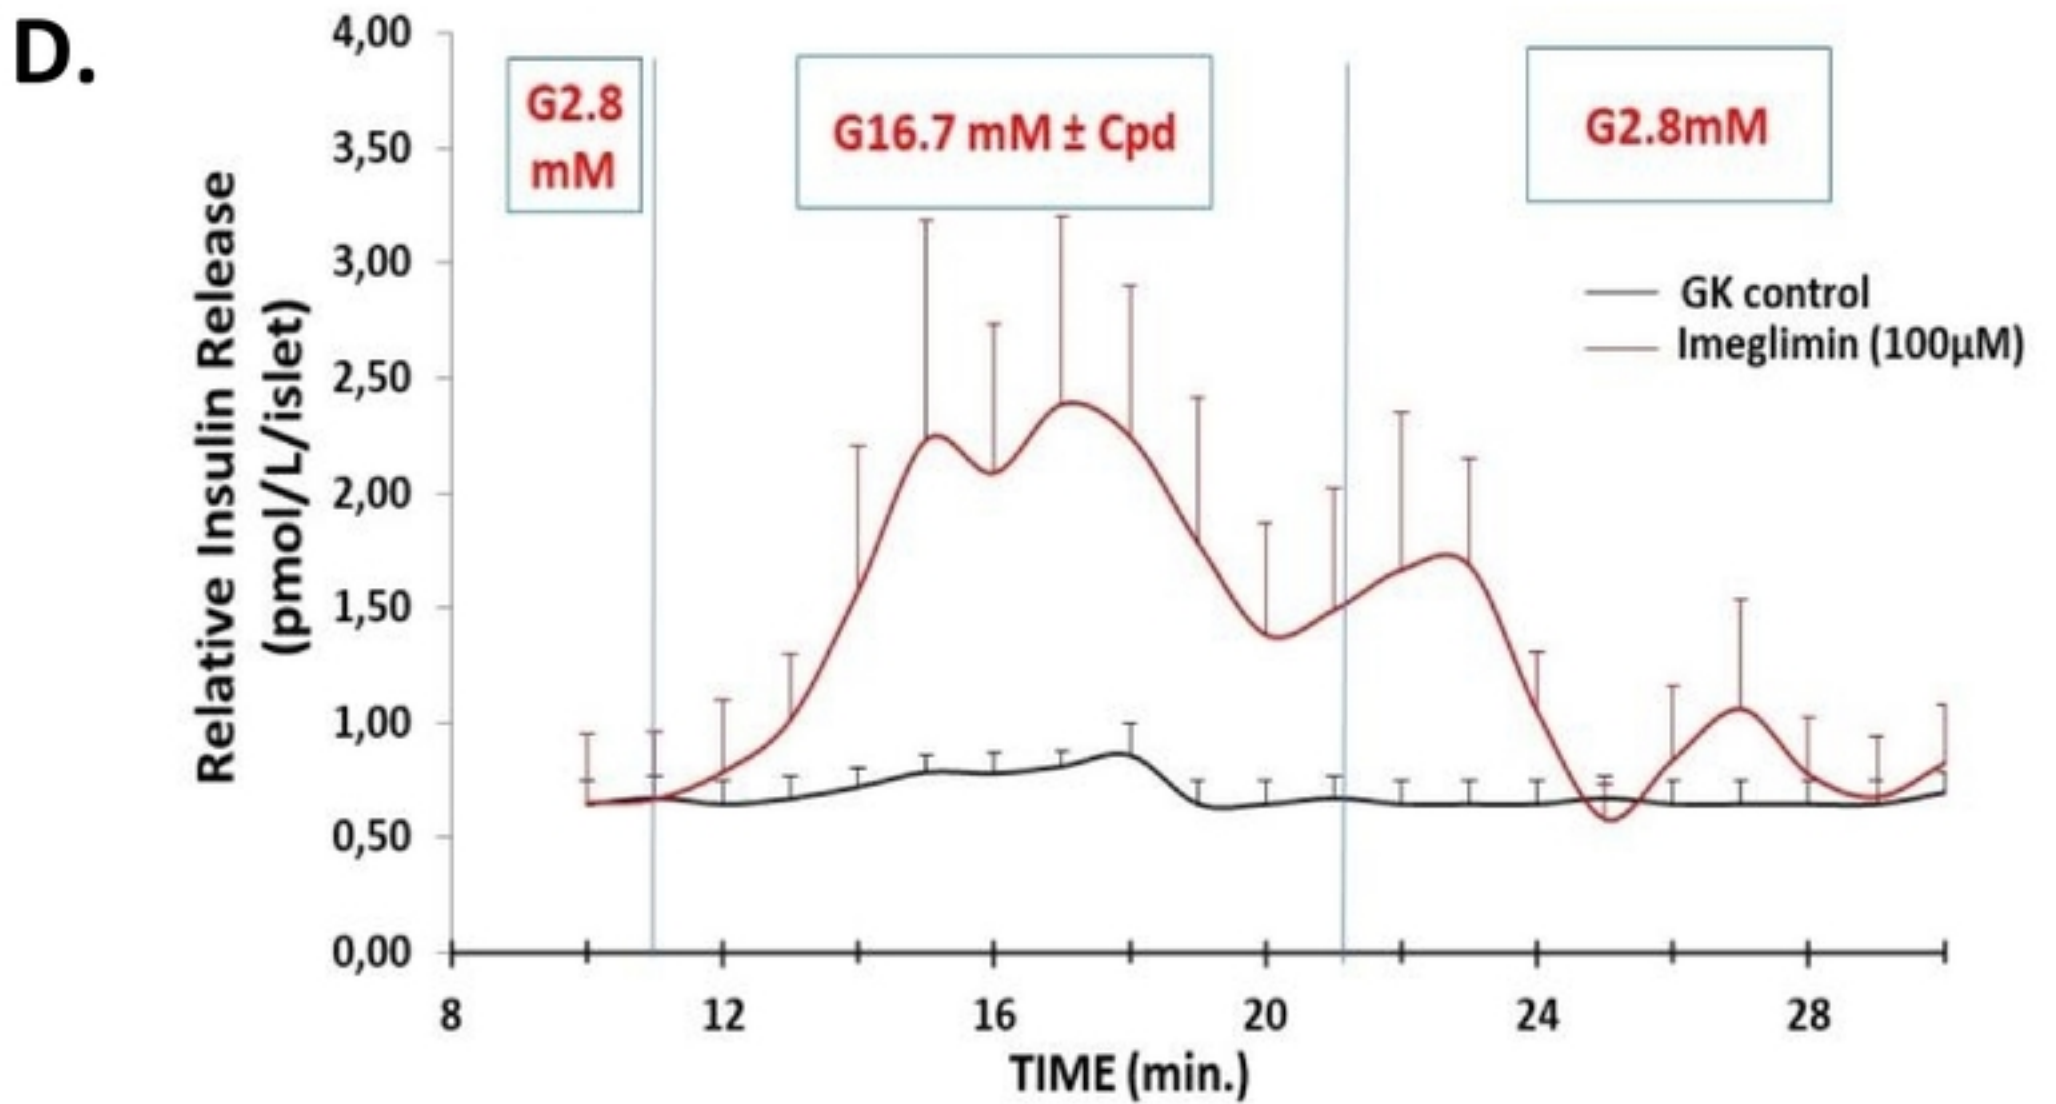

**Figure 3**

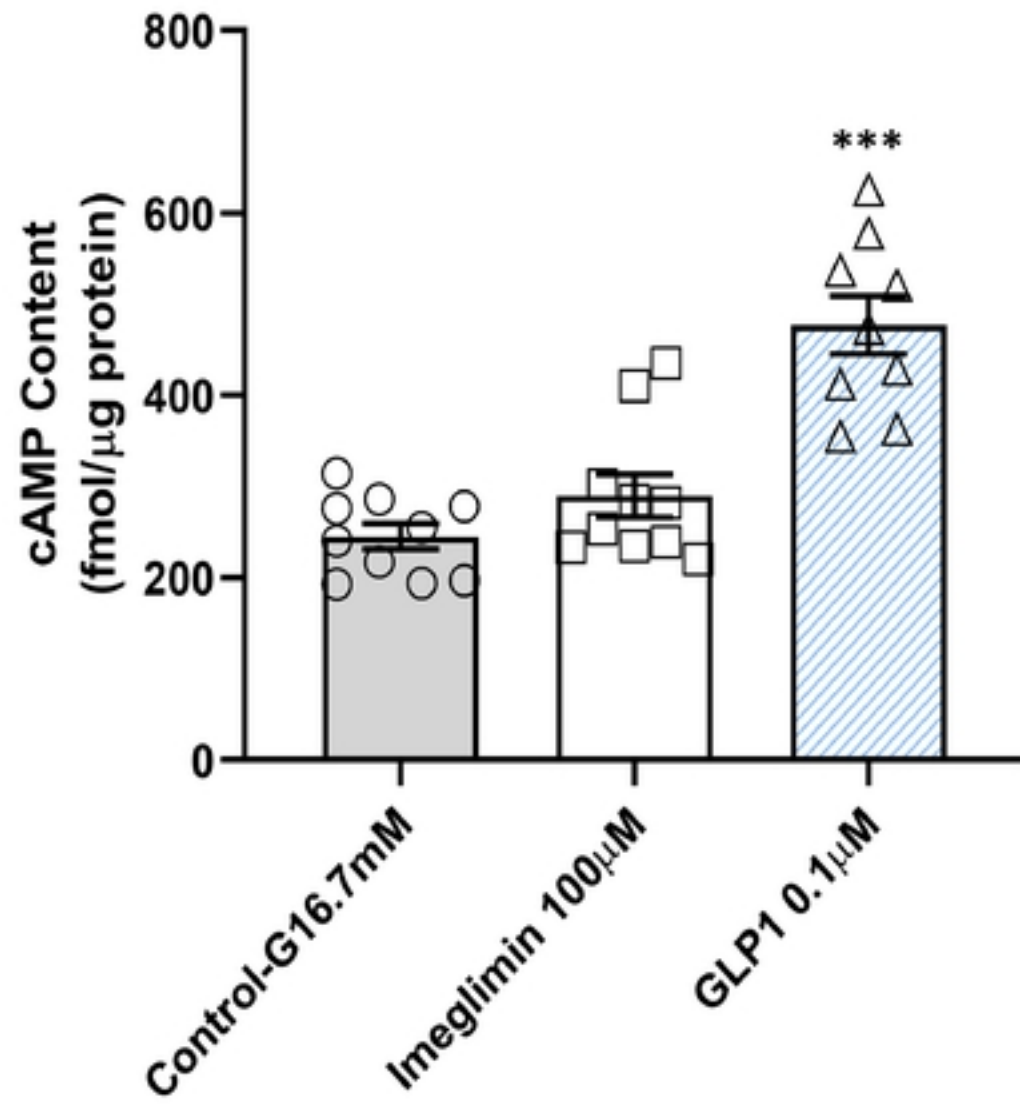

Figure

# Figure 4

A.

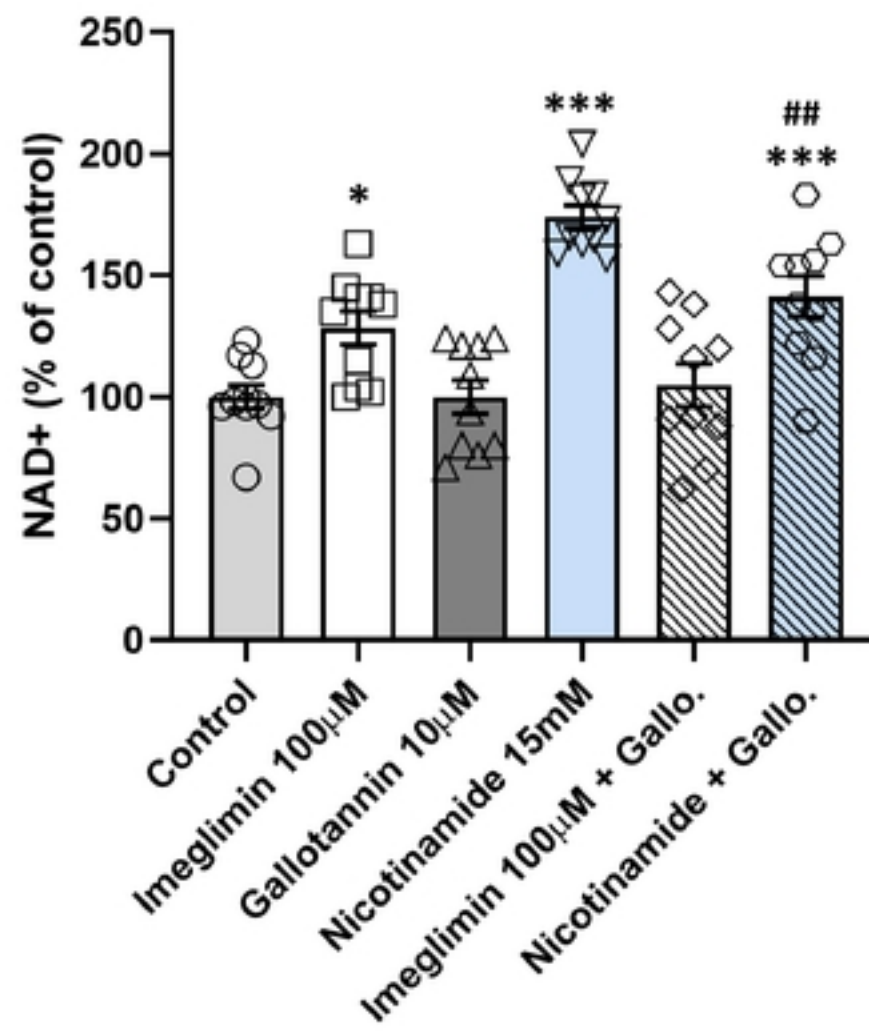

bioRxiv preprint doi: <https://doi.org/10.1101/2020.10.20.346841>; this version posted October 20, 2020. The copyright holder for this preprint (which was not certified by peer review) is the author/funder, who has granted bioRxiv a license to display the preprint in perpetuity. It is made available under aCC-BY 4.0 International license.

B.

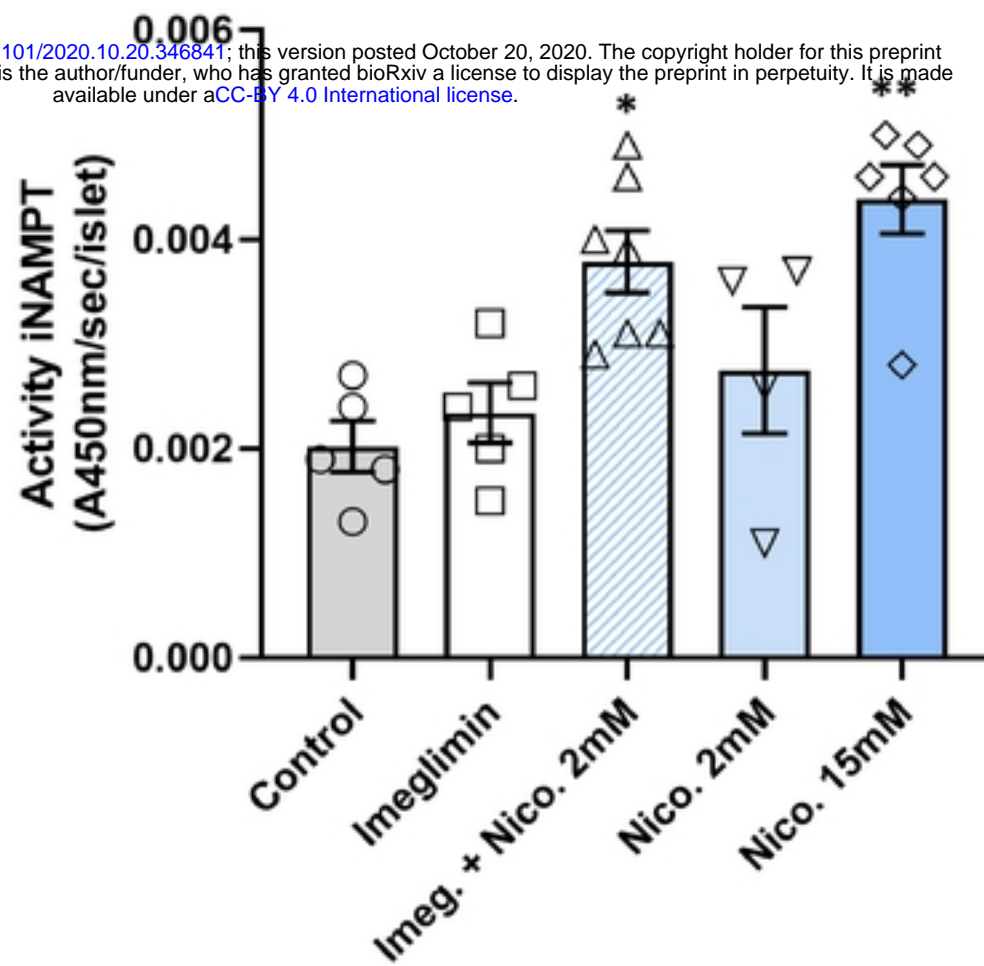

C.

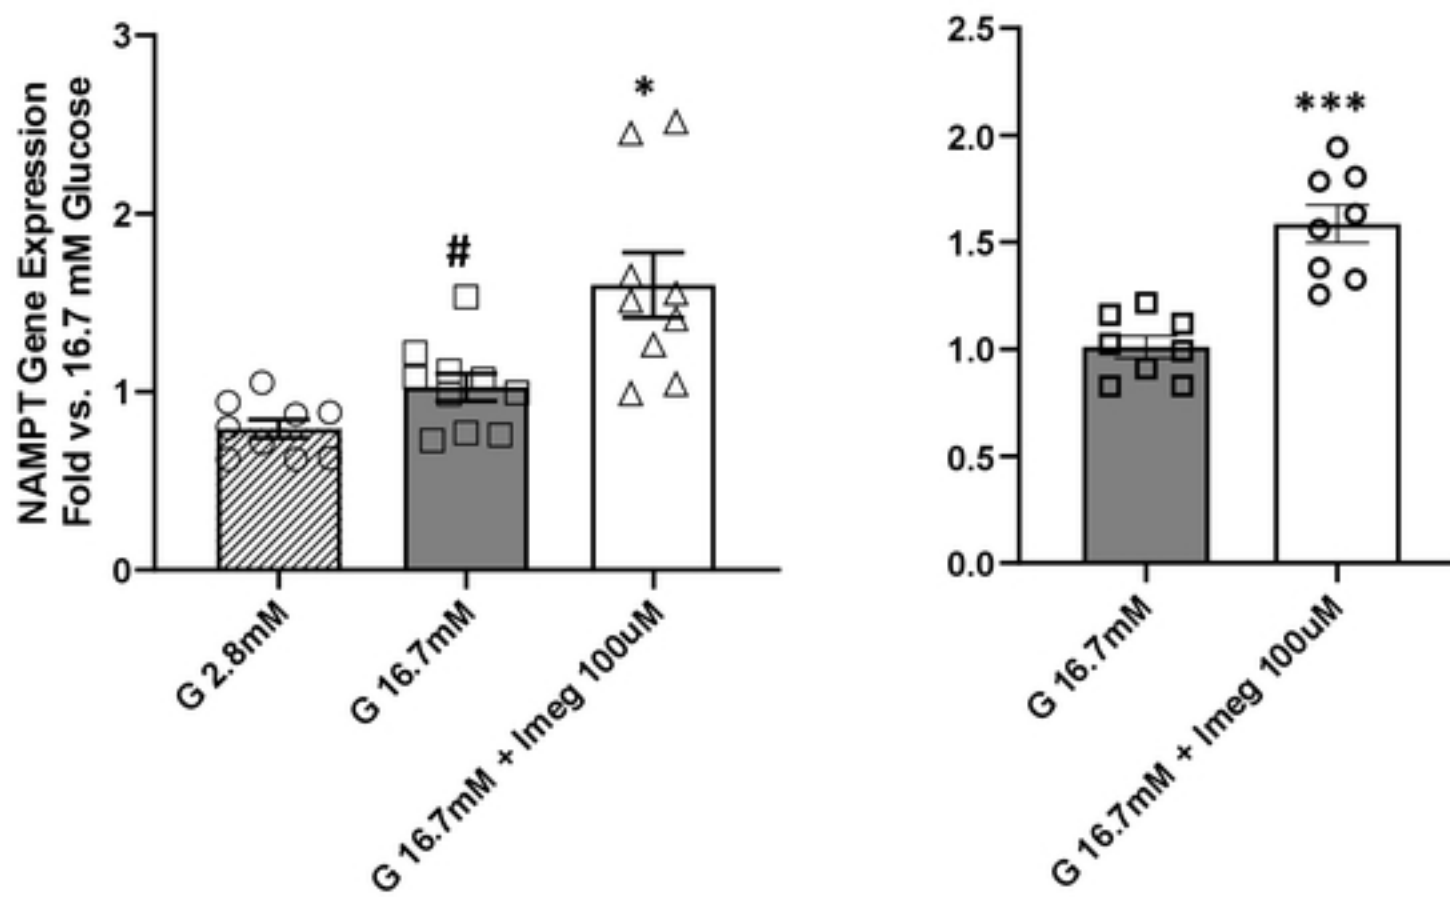



**Figure 5**

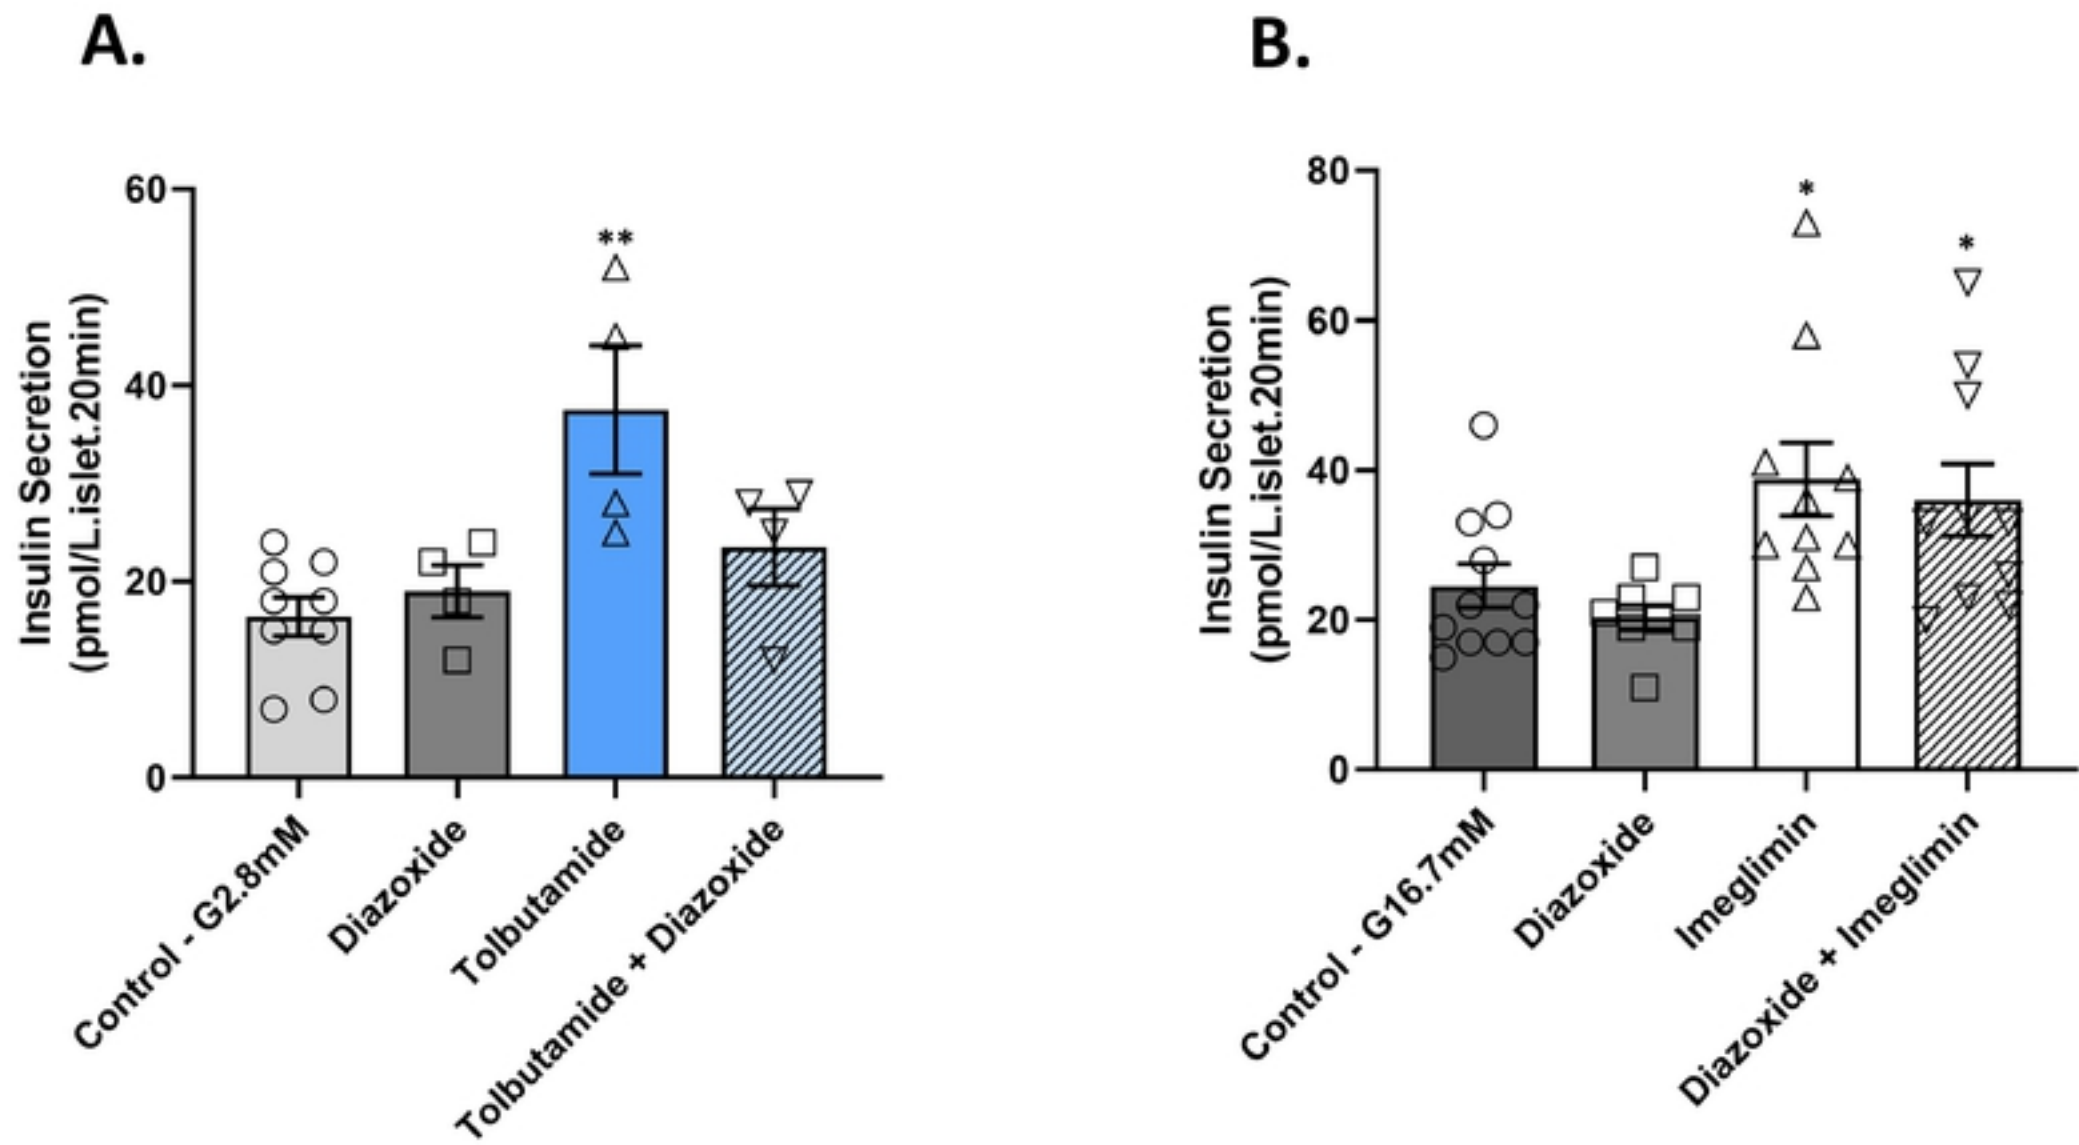

Figure

# Figure 6

## A.

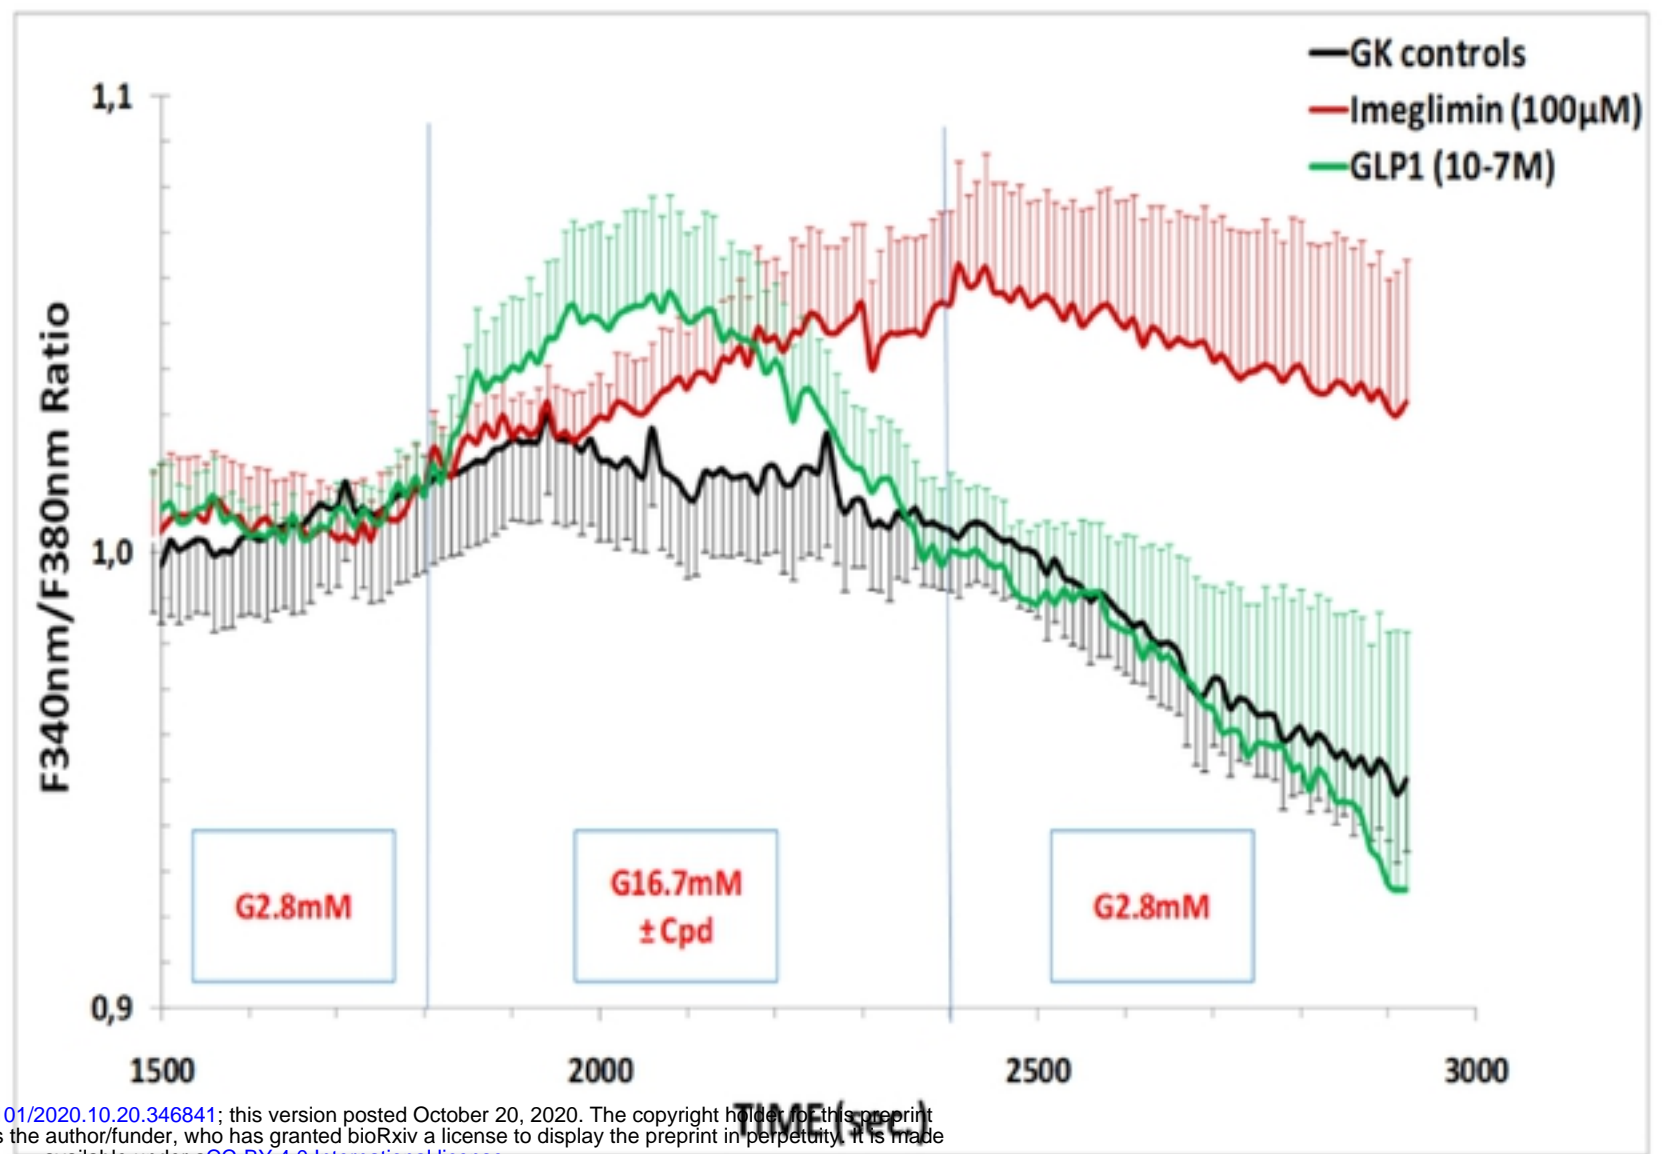

bioRxiv preprint doi: <https://doi.org/10.1101/2020.10.20.346841>; this version posted October 20, 2020. The copyright holder for this preprint (which was not certified by peer review) is the author/funder, who has granted bioRxiv a license to display the preprint in perpetuity. It is made available under aCC-BY 4.0 International license.

## B.

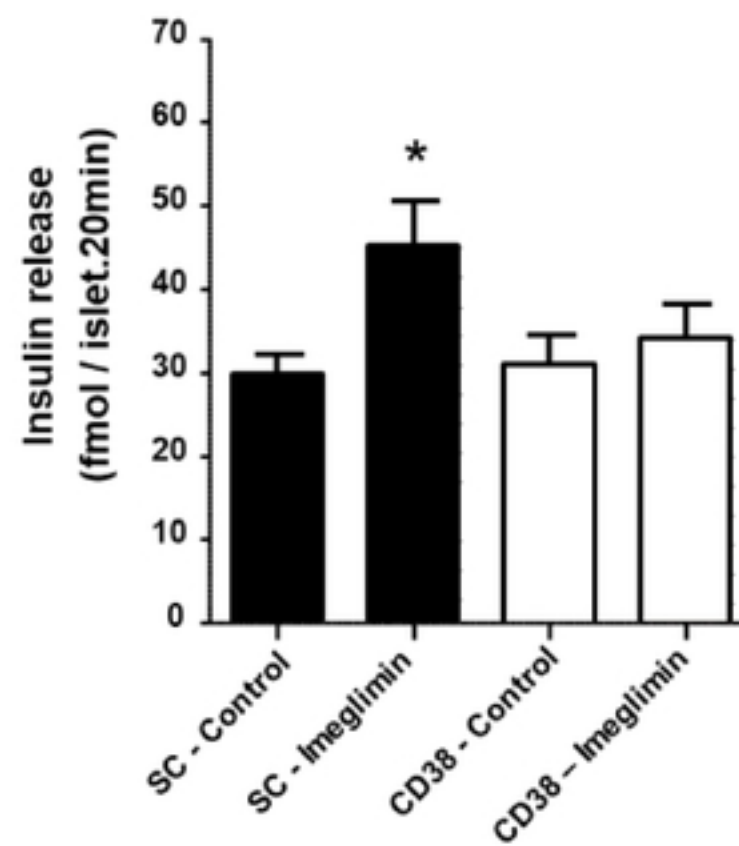

## C.

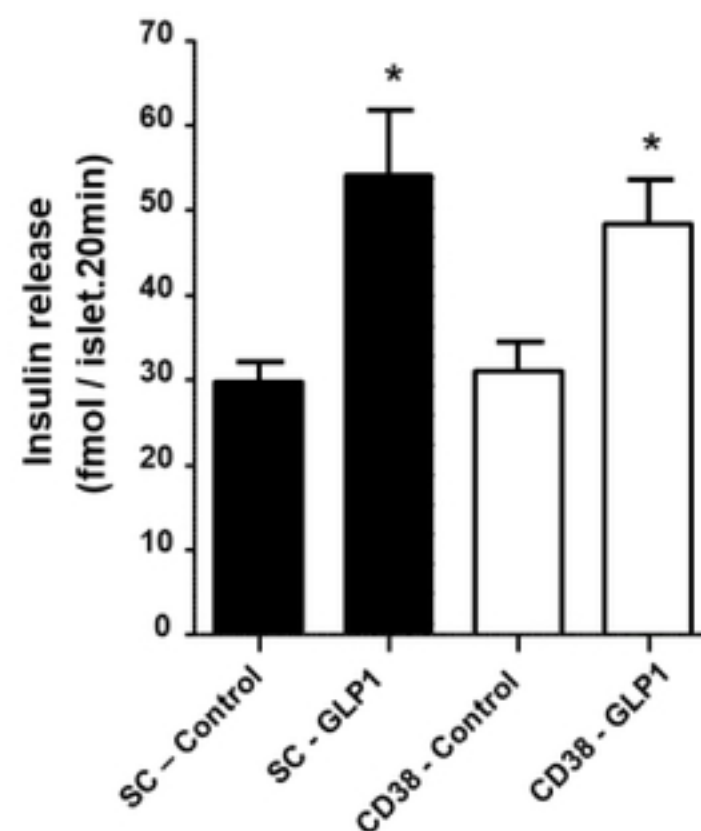

**Figure 7**

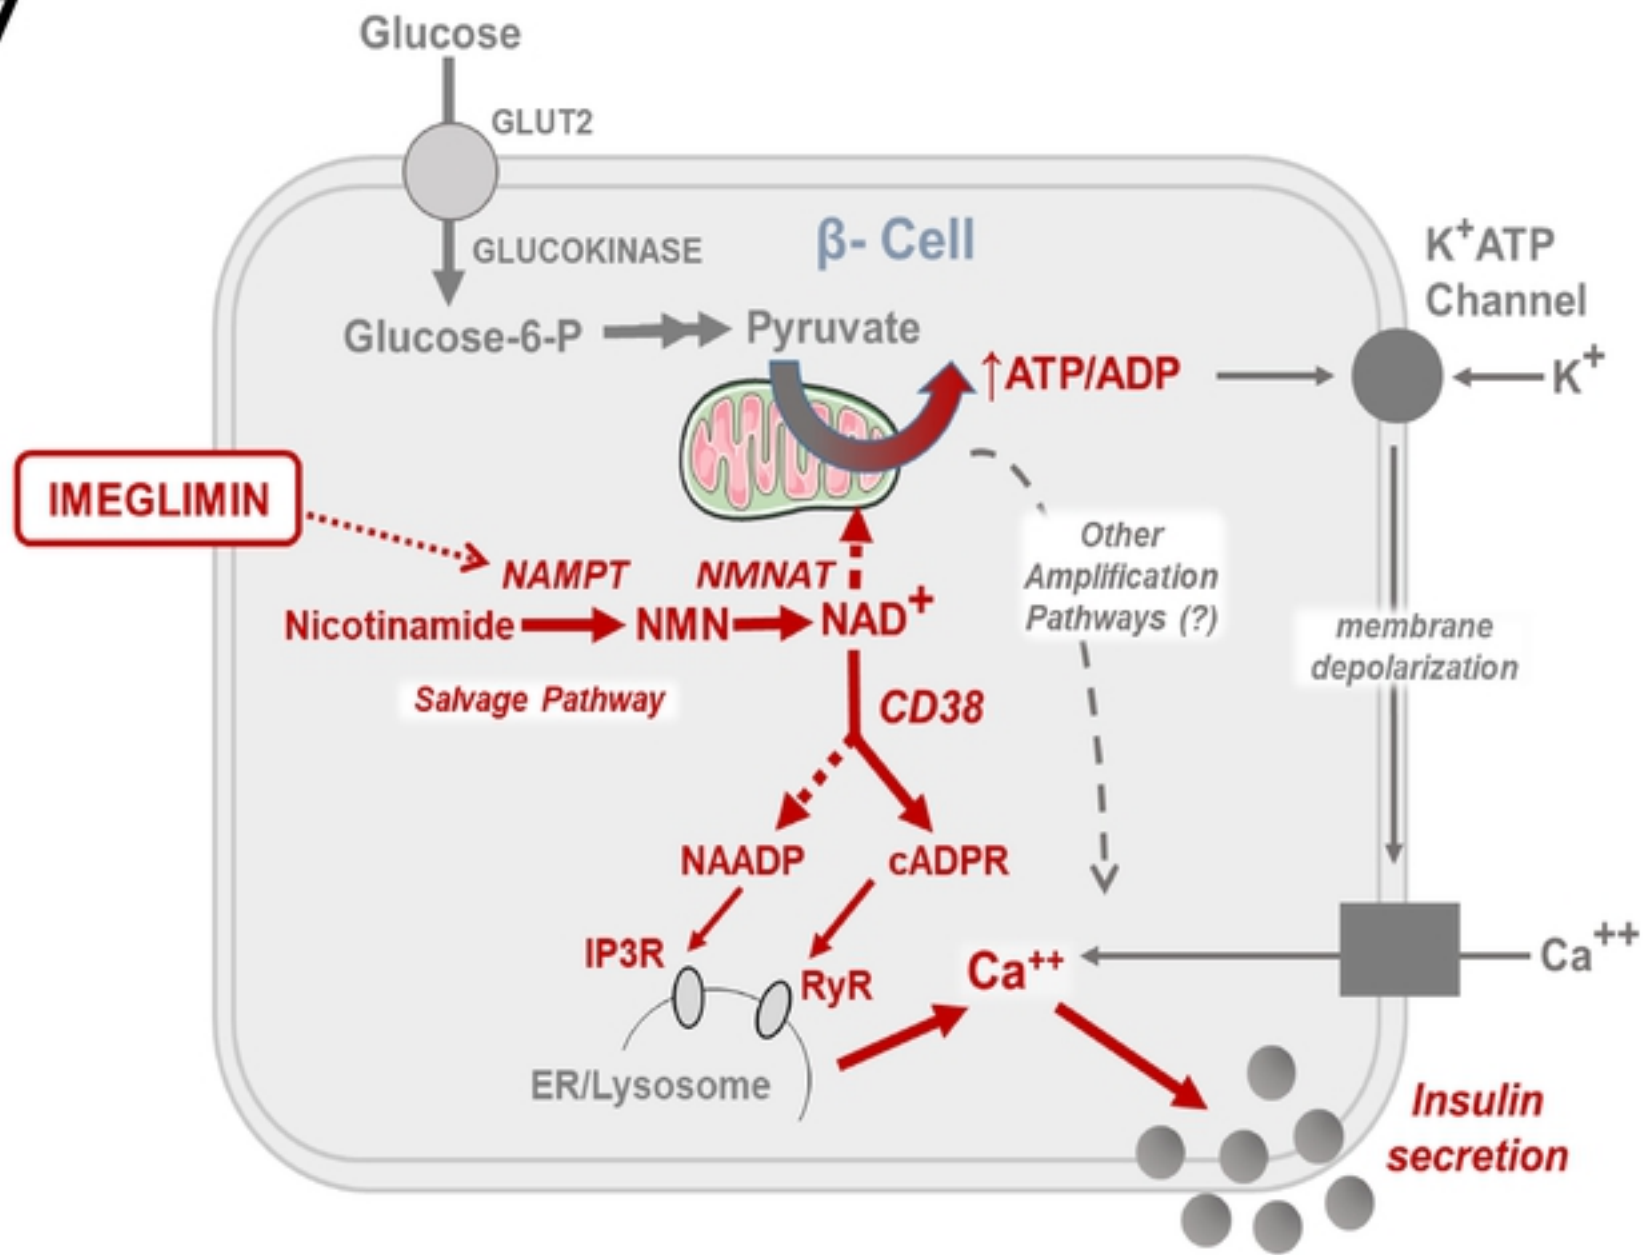

Figure
